# Supplementary material for: Species identification of adult African blowflies (Diptera: Calliphoridae) of forensic importance
Source: Springer Nature journal article supplement (doi:10.1007/s00414-017-1654-y), 2017-08-28

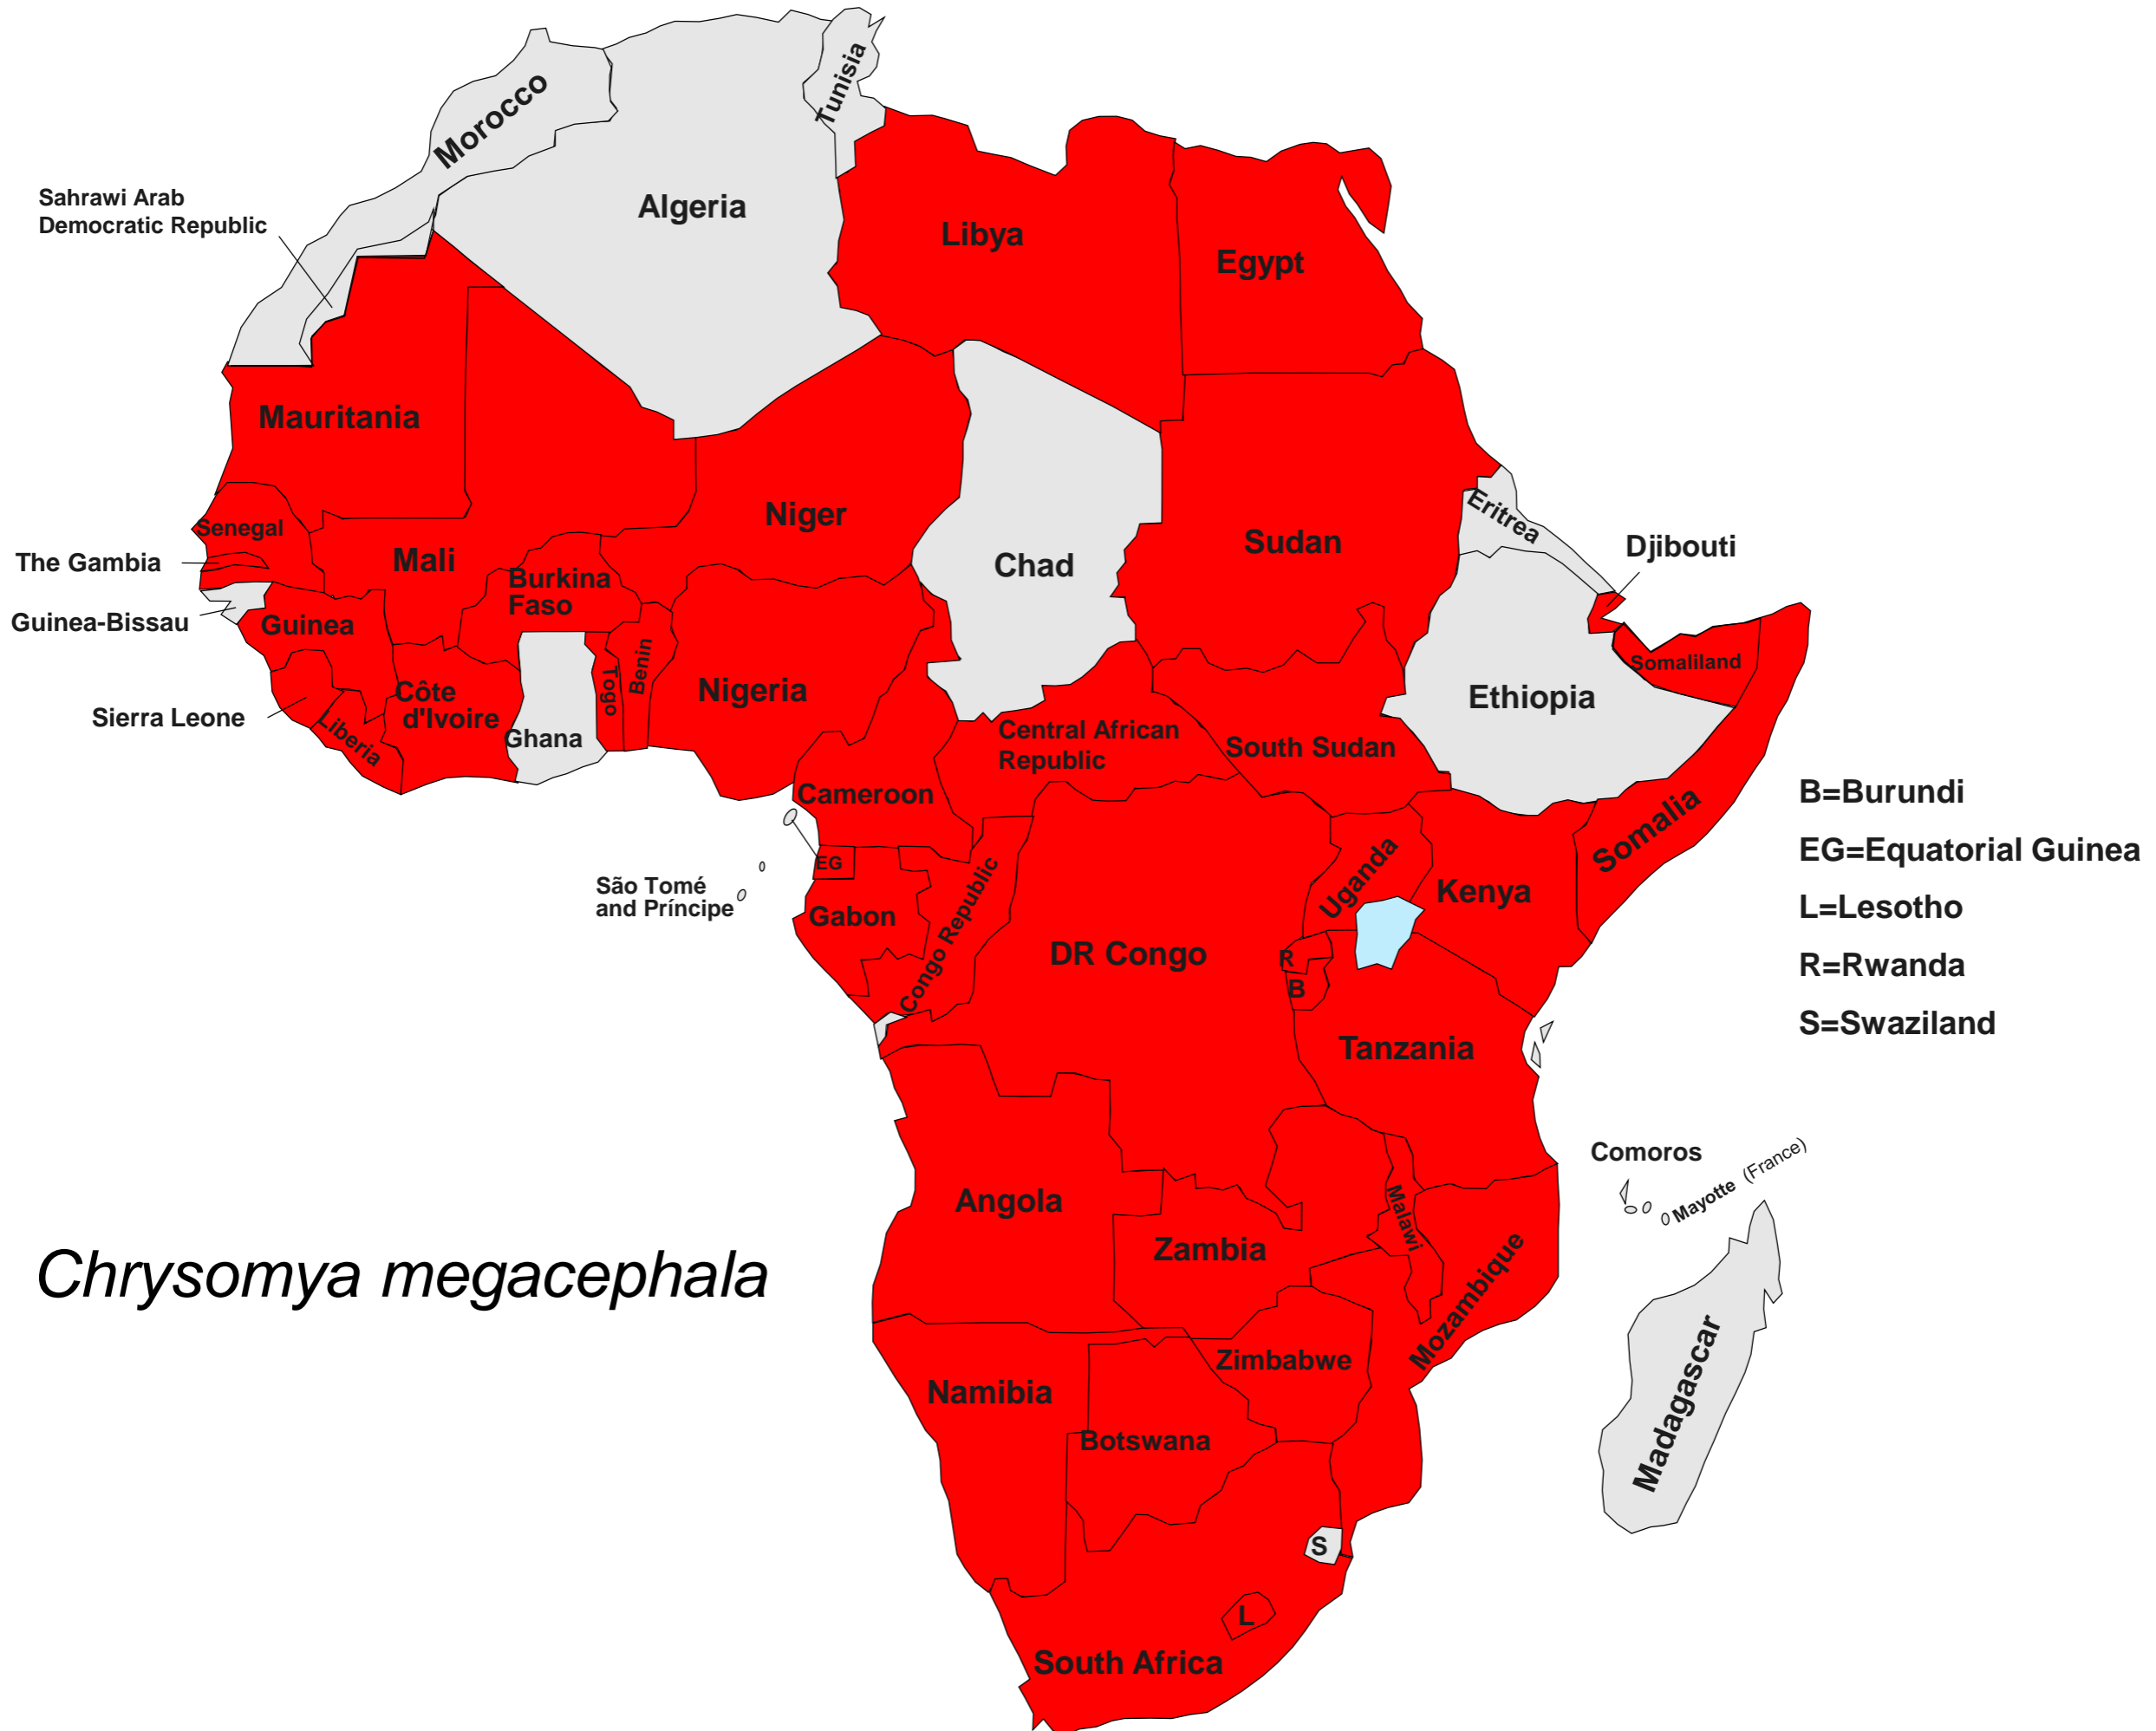

Sahrawi Arab Democratic Republic

Morocco

Tunisia

Algeria

Libya

Egypt

Mauritania

Niger

Chad

Sudan

Eritrea

Djibouti

The Gambia

Senegal

Mali

Burkina Faso

Guinea-Bissau

Guinea

Togo

Benin

Nigeria

Sierra Leone

Liberia

Côte d'Ivoire

Ghana

Central African Republic

South Sudan

Ethiopia

Somaliland

São Tomé and Príncipe

Cameroon

EG

Gabon

Congo Republic

DR Congo

R

B

Uganda

Kenya

Somalia

Tanzania

Comoros

Mayotte (France)

Angola

Zambia

Malawi

Mozambique

Namibia

Zimbabwe

Botswana

S

L

South Africa

Madagascar

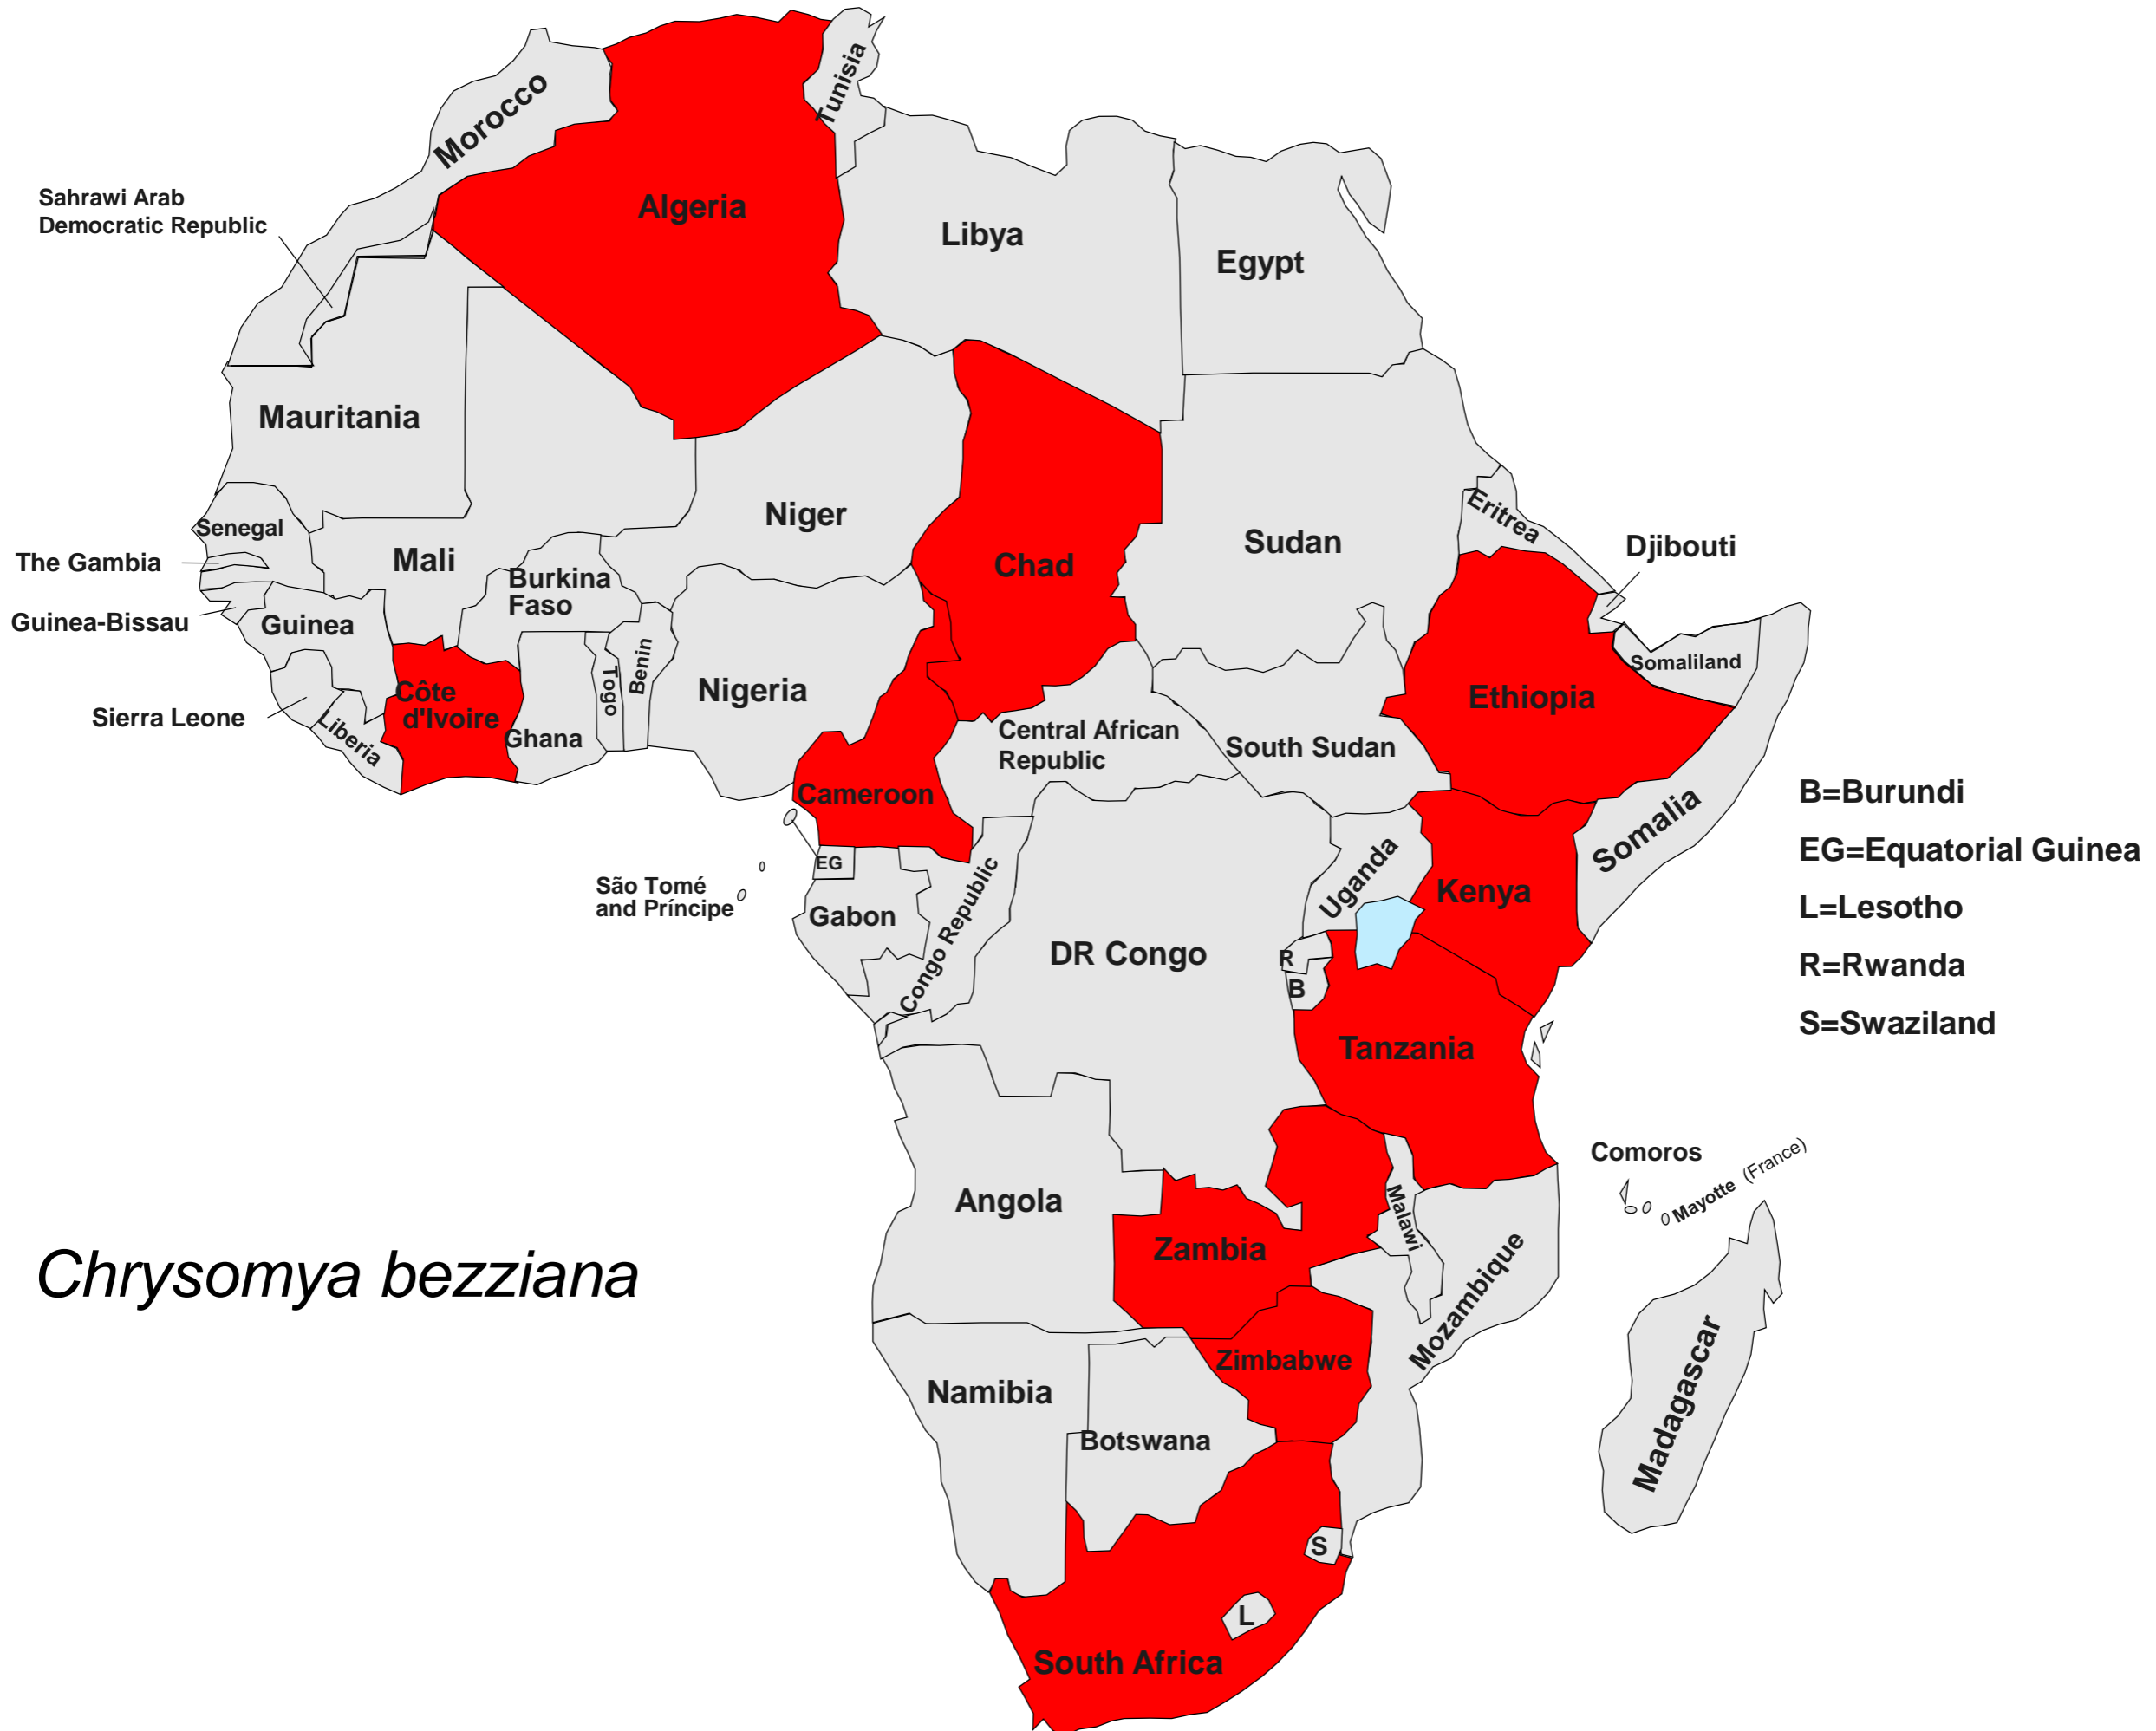

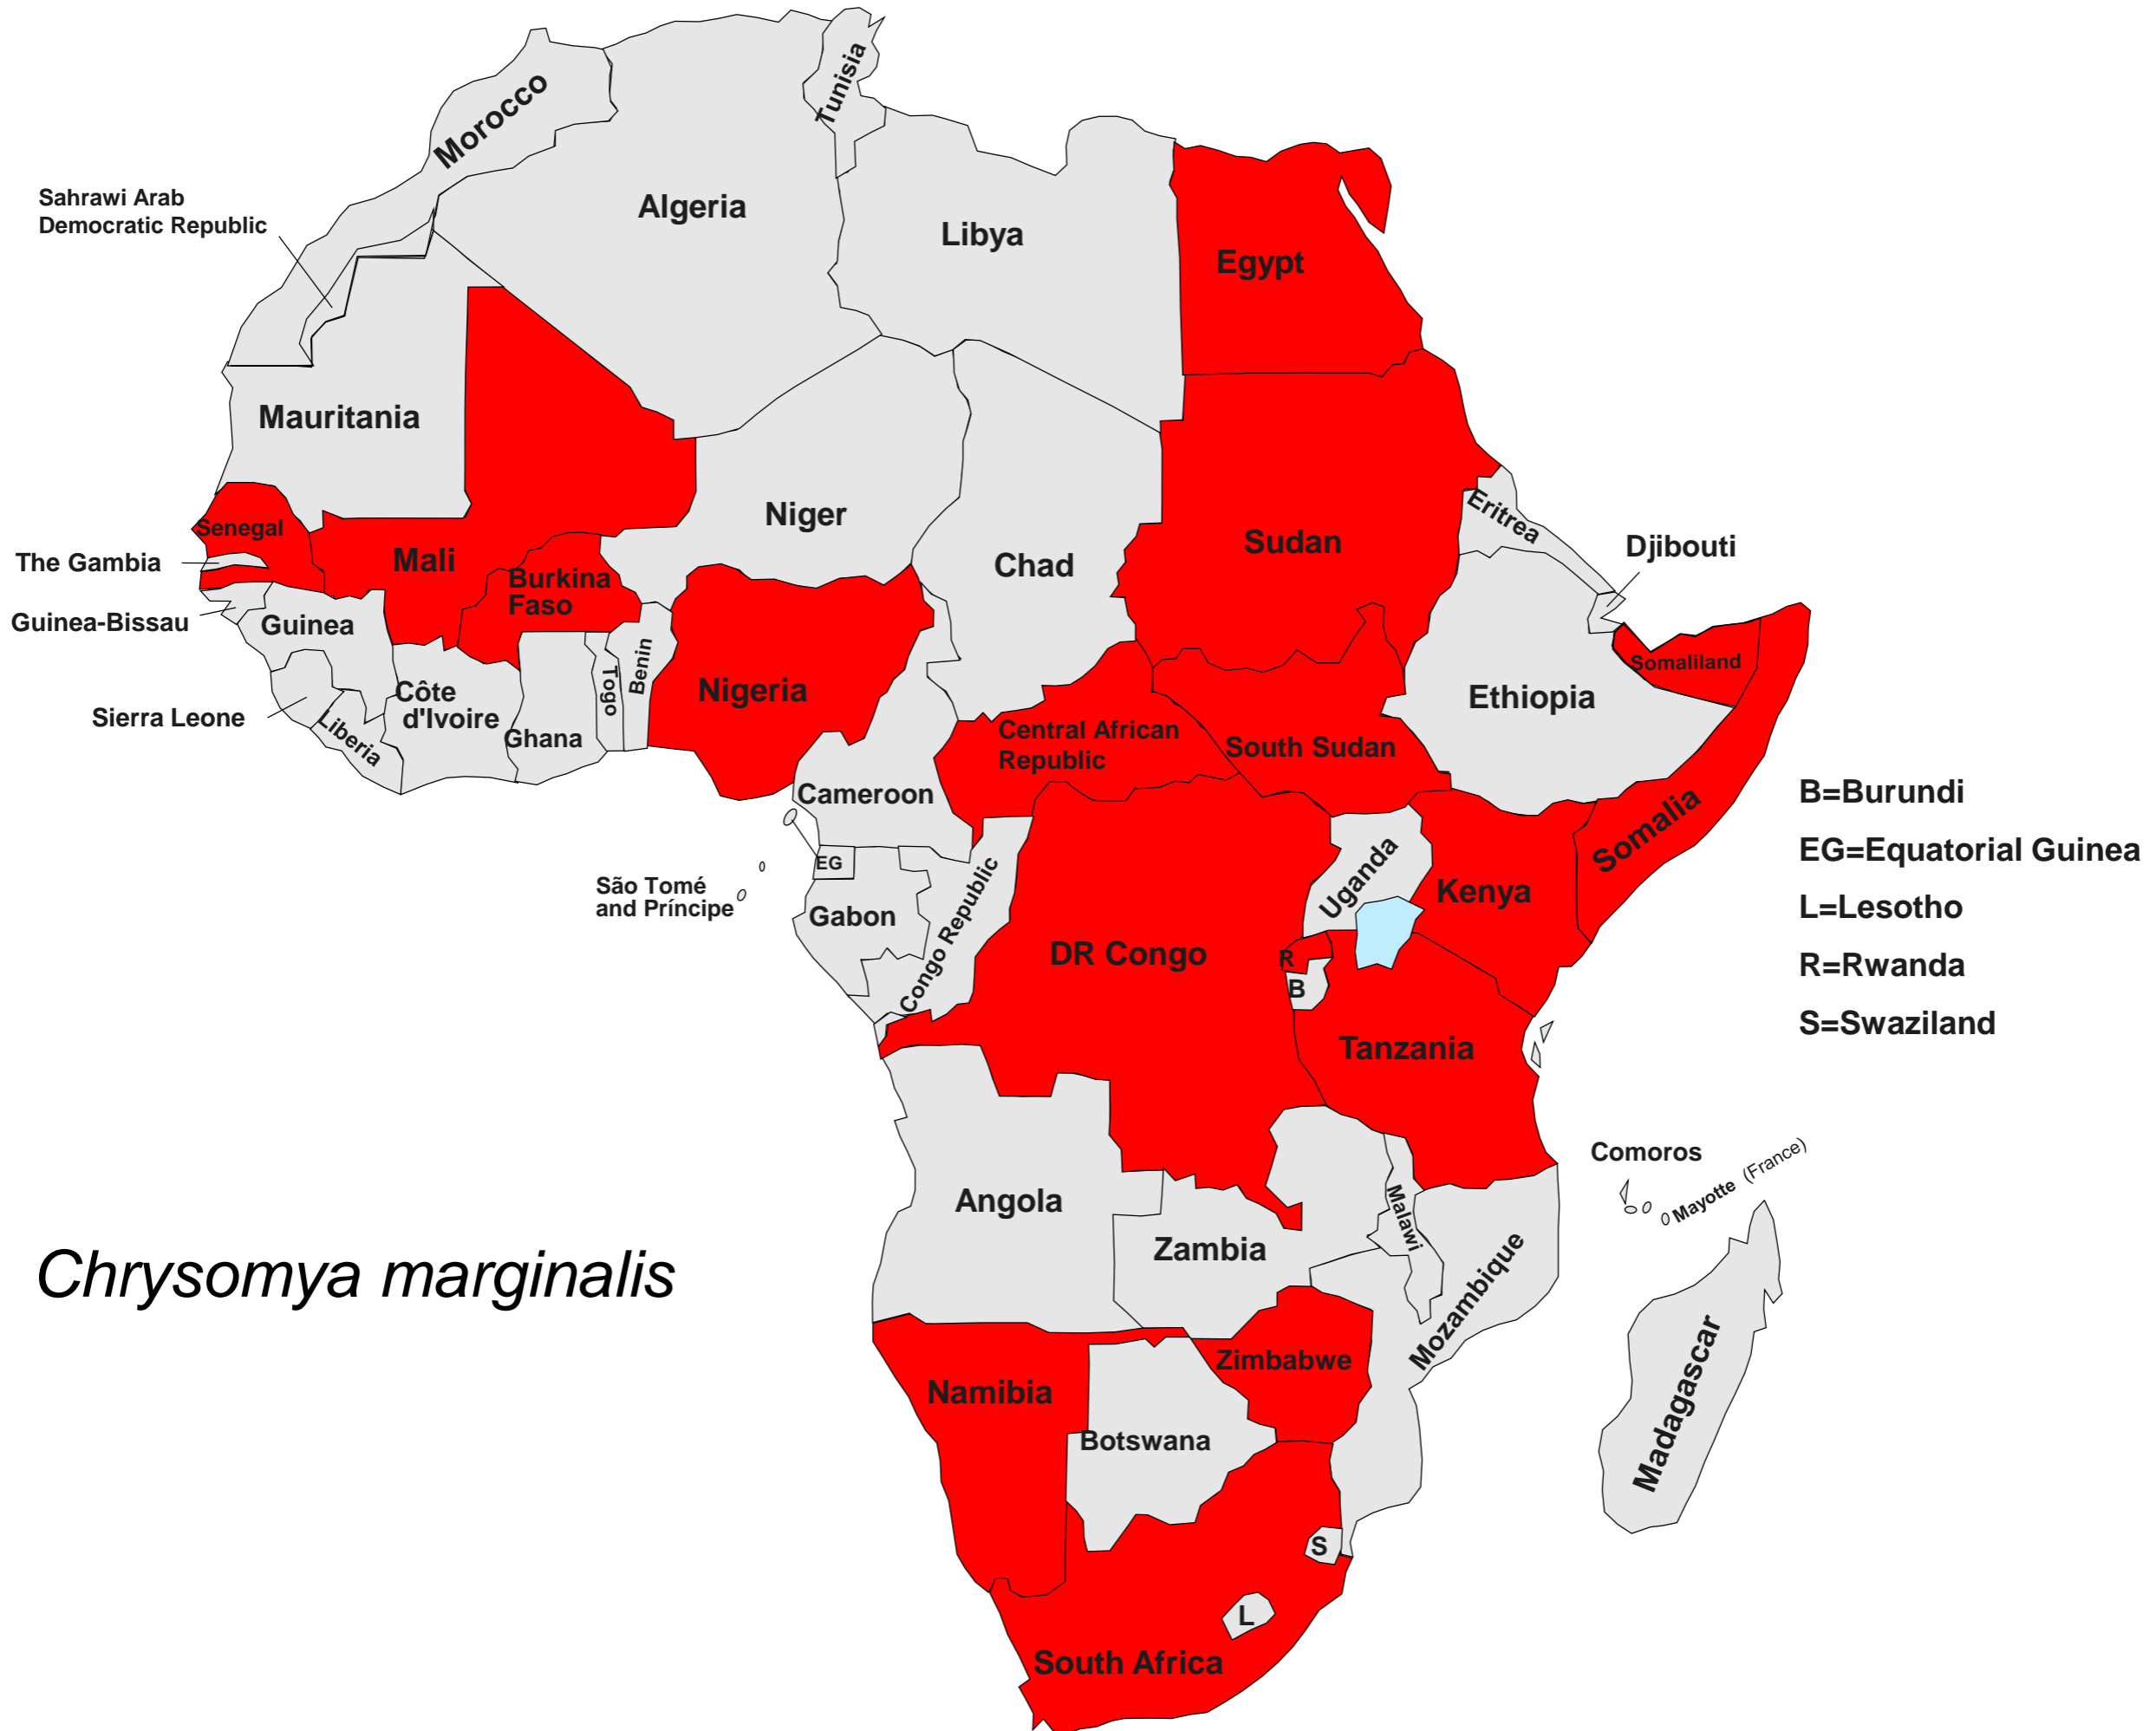

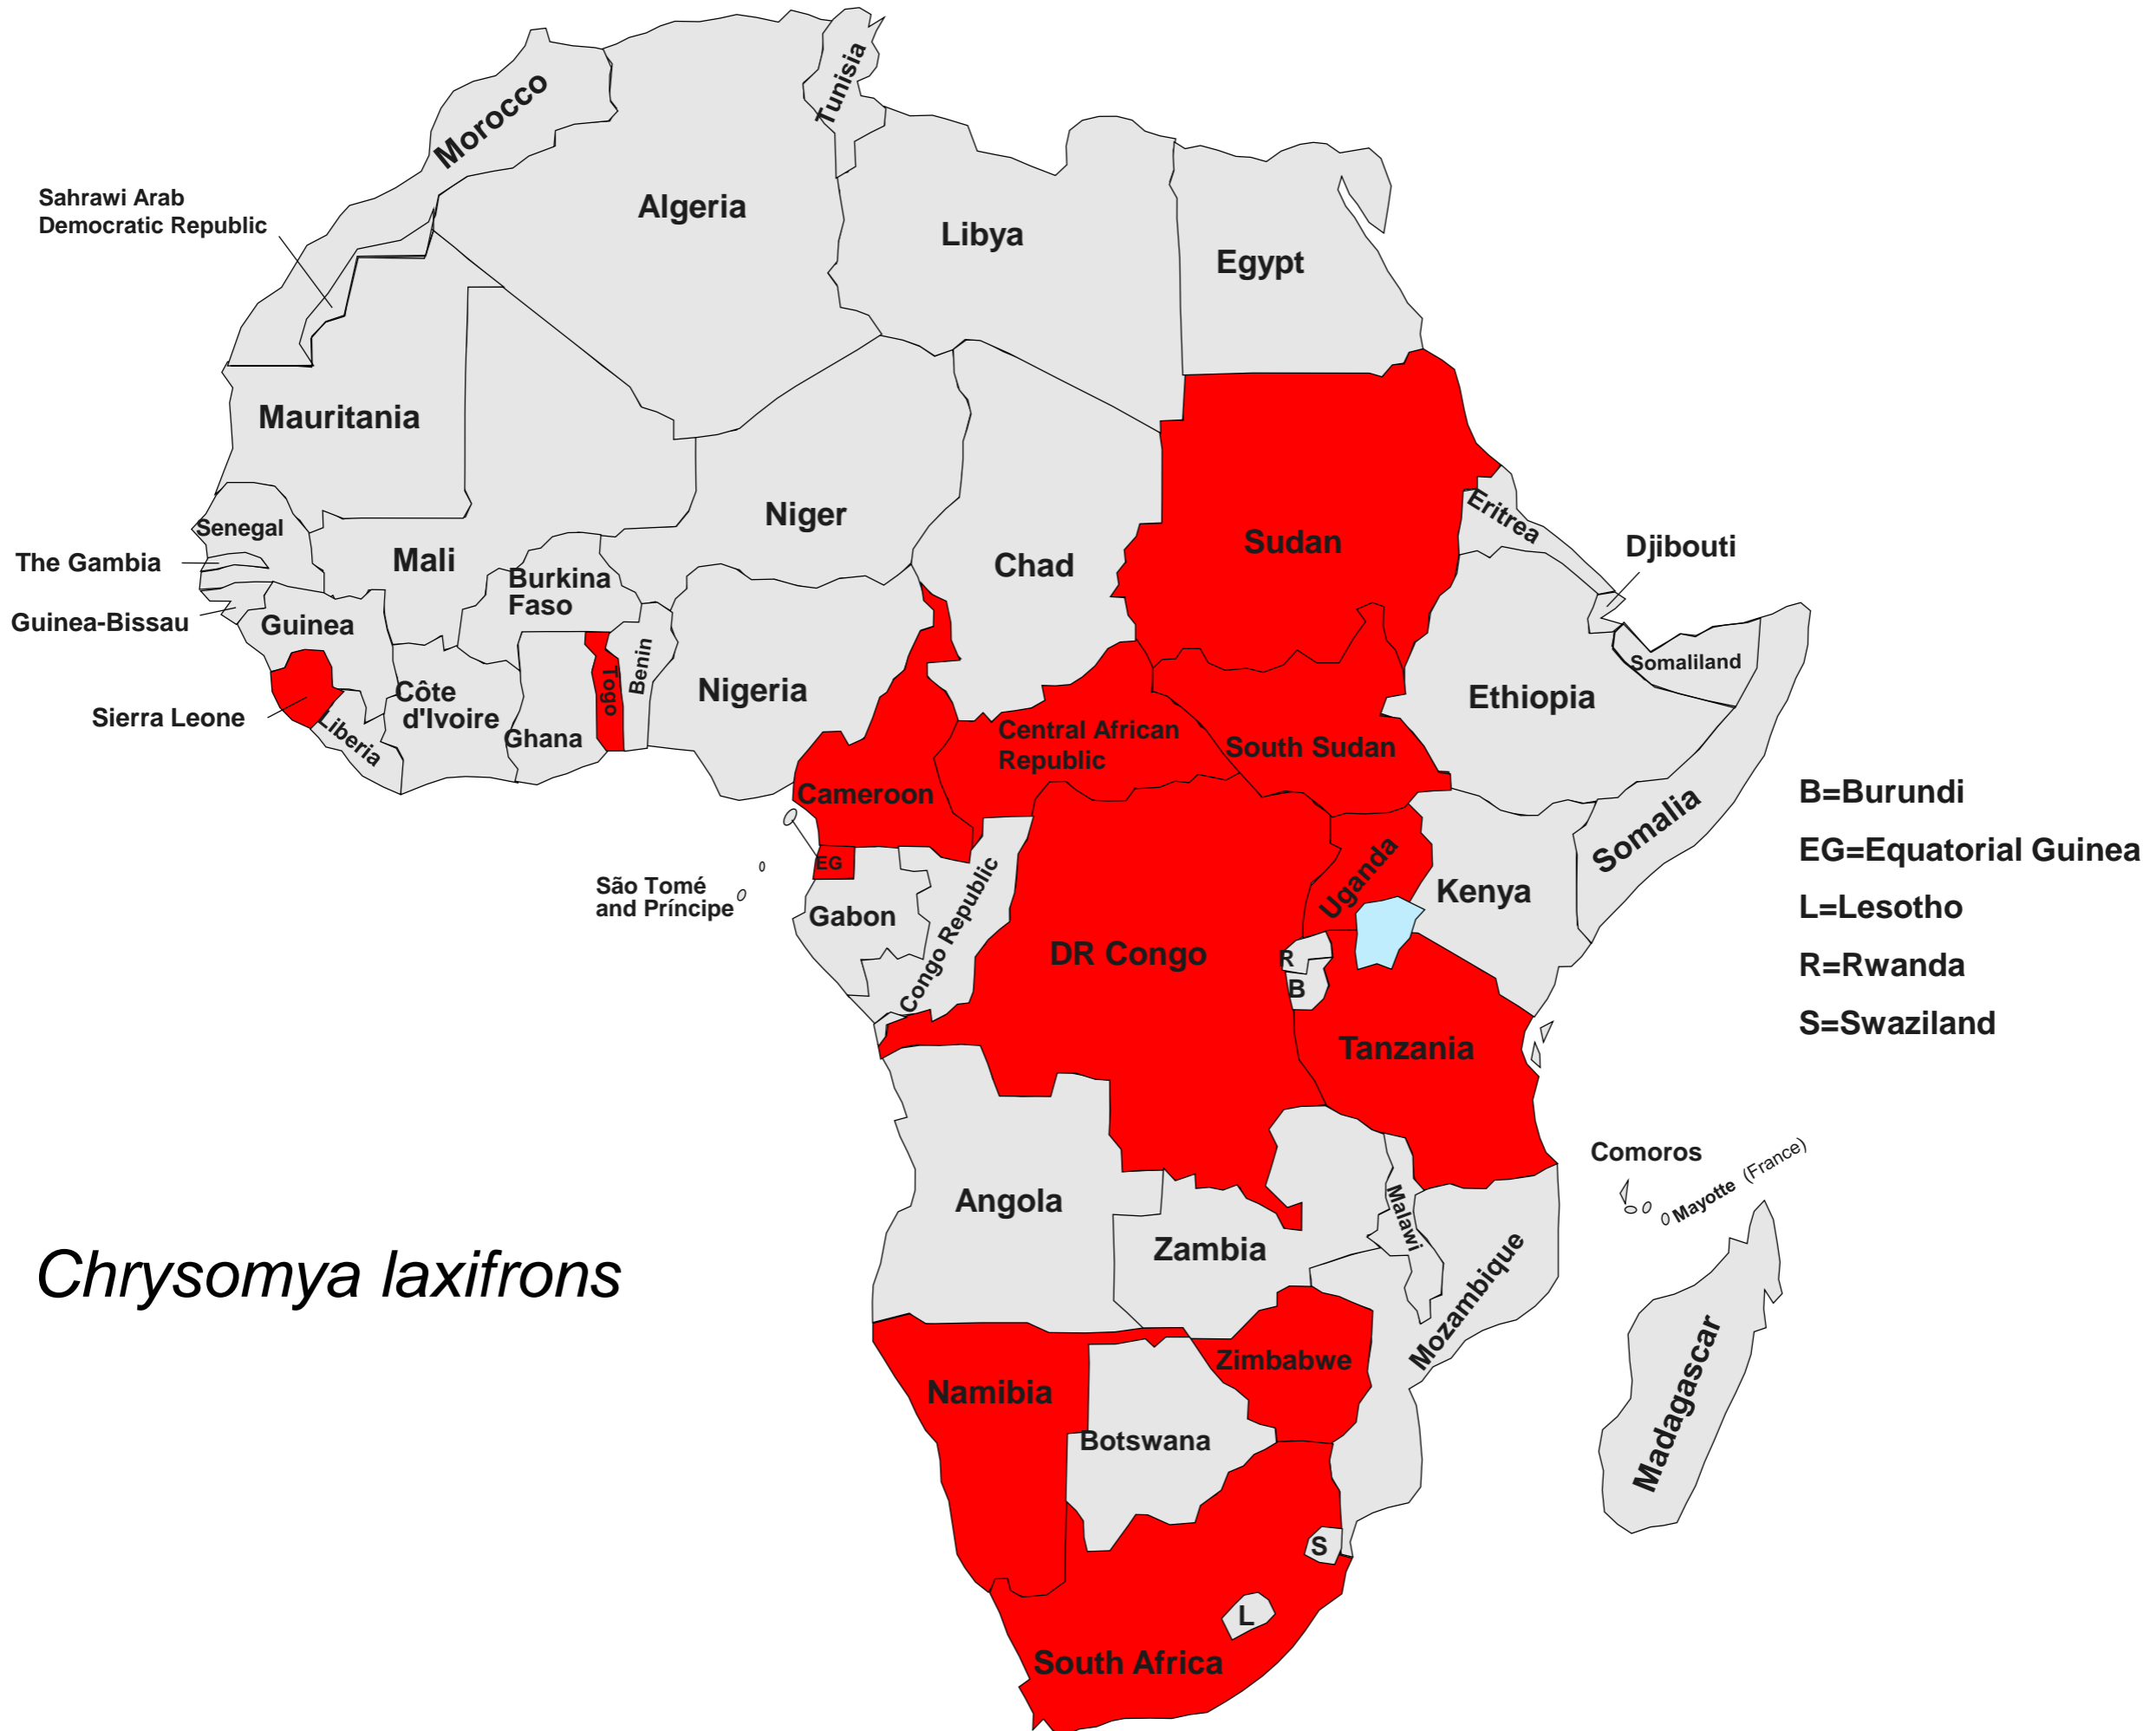

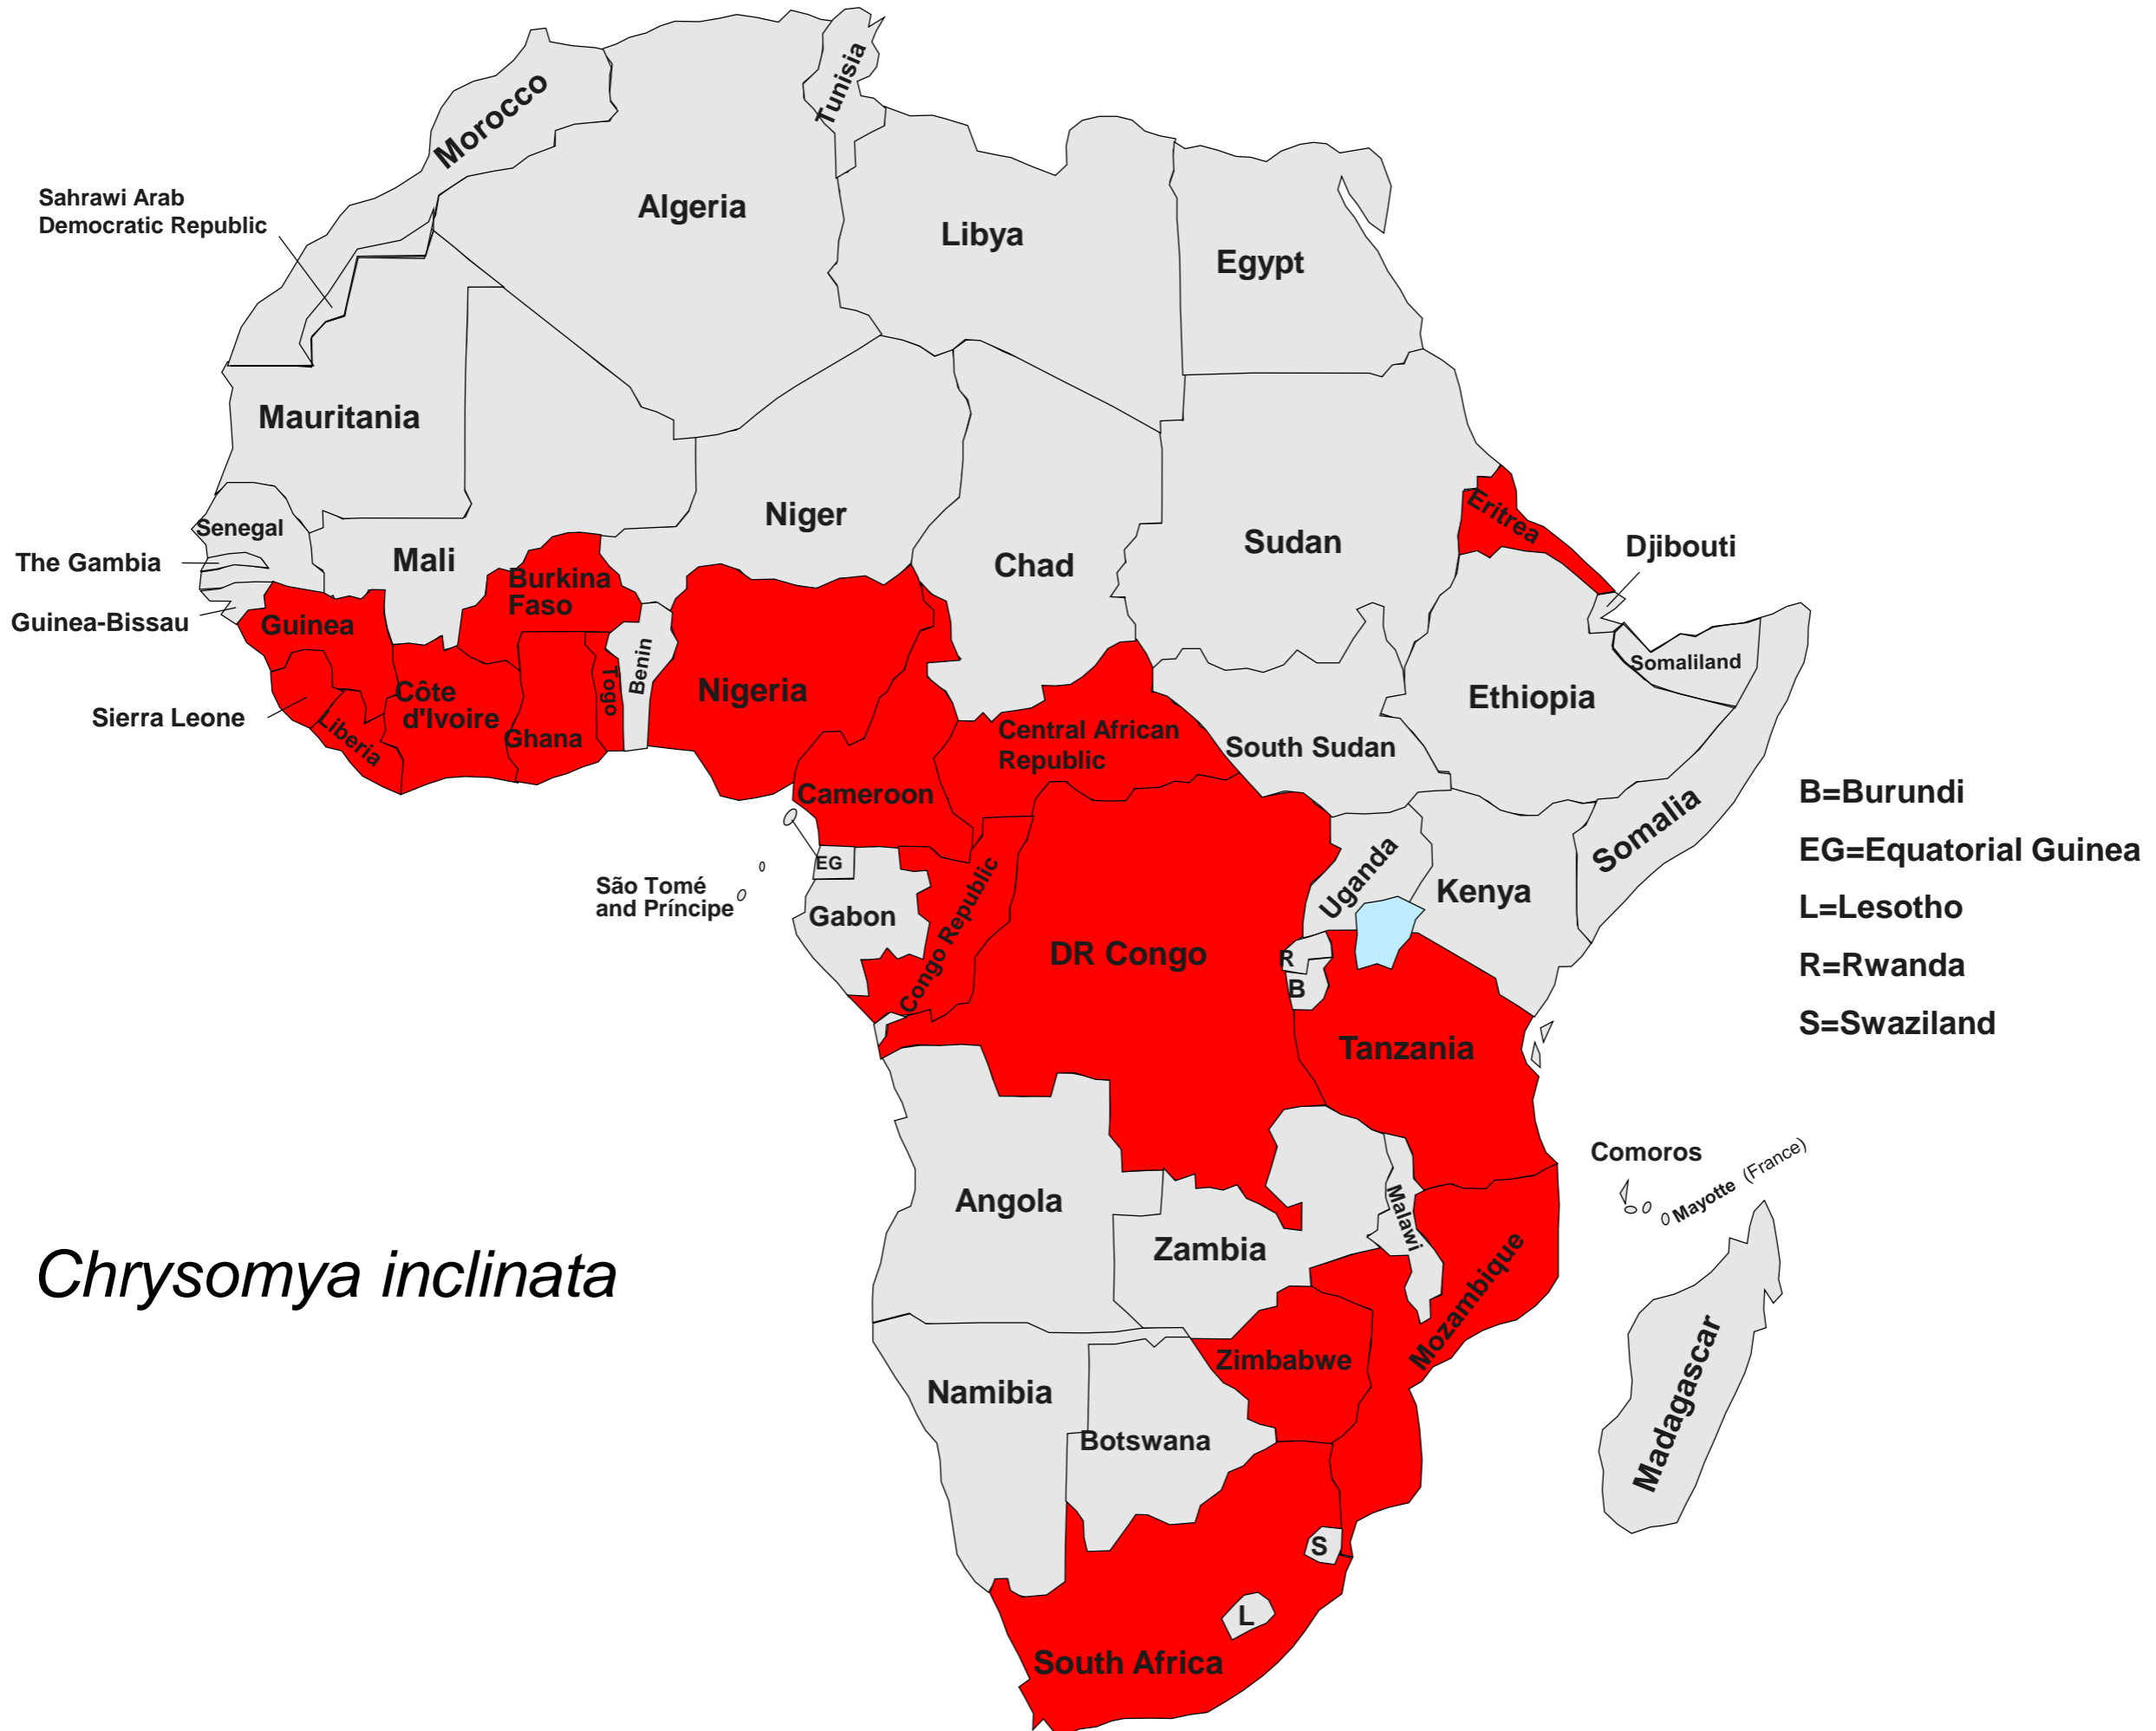

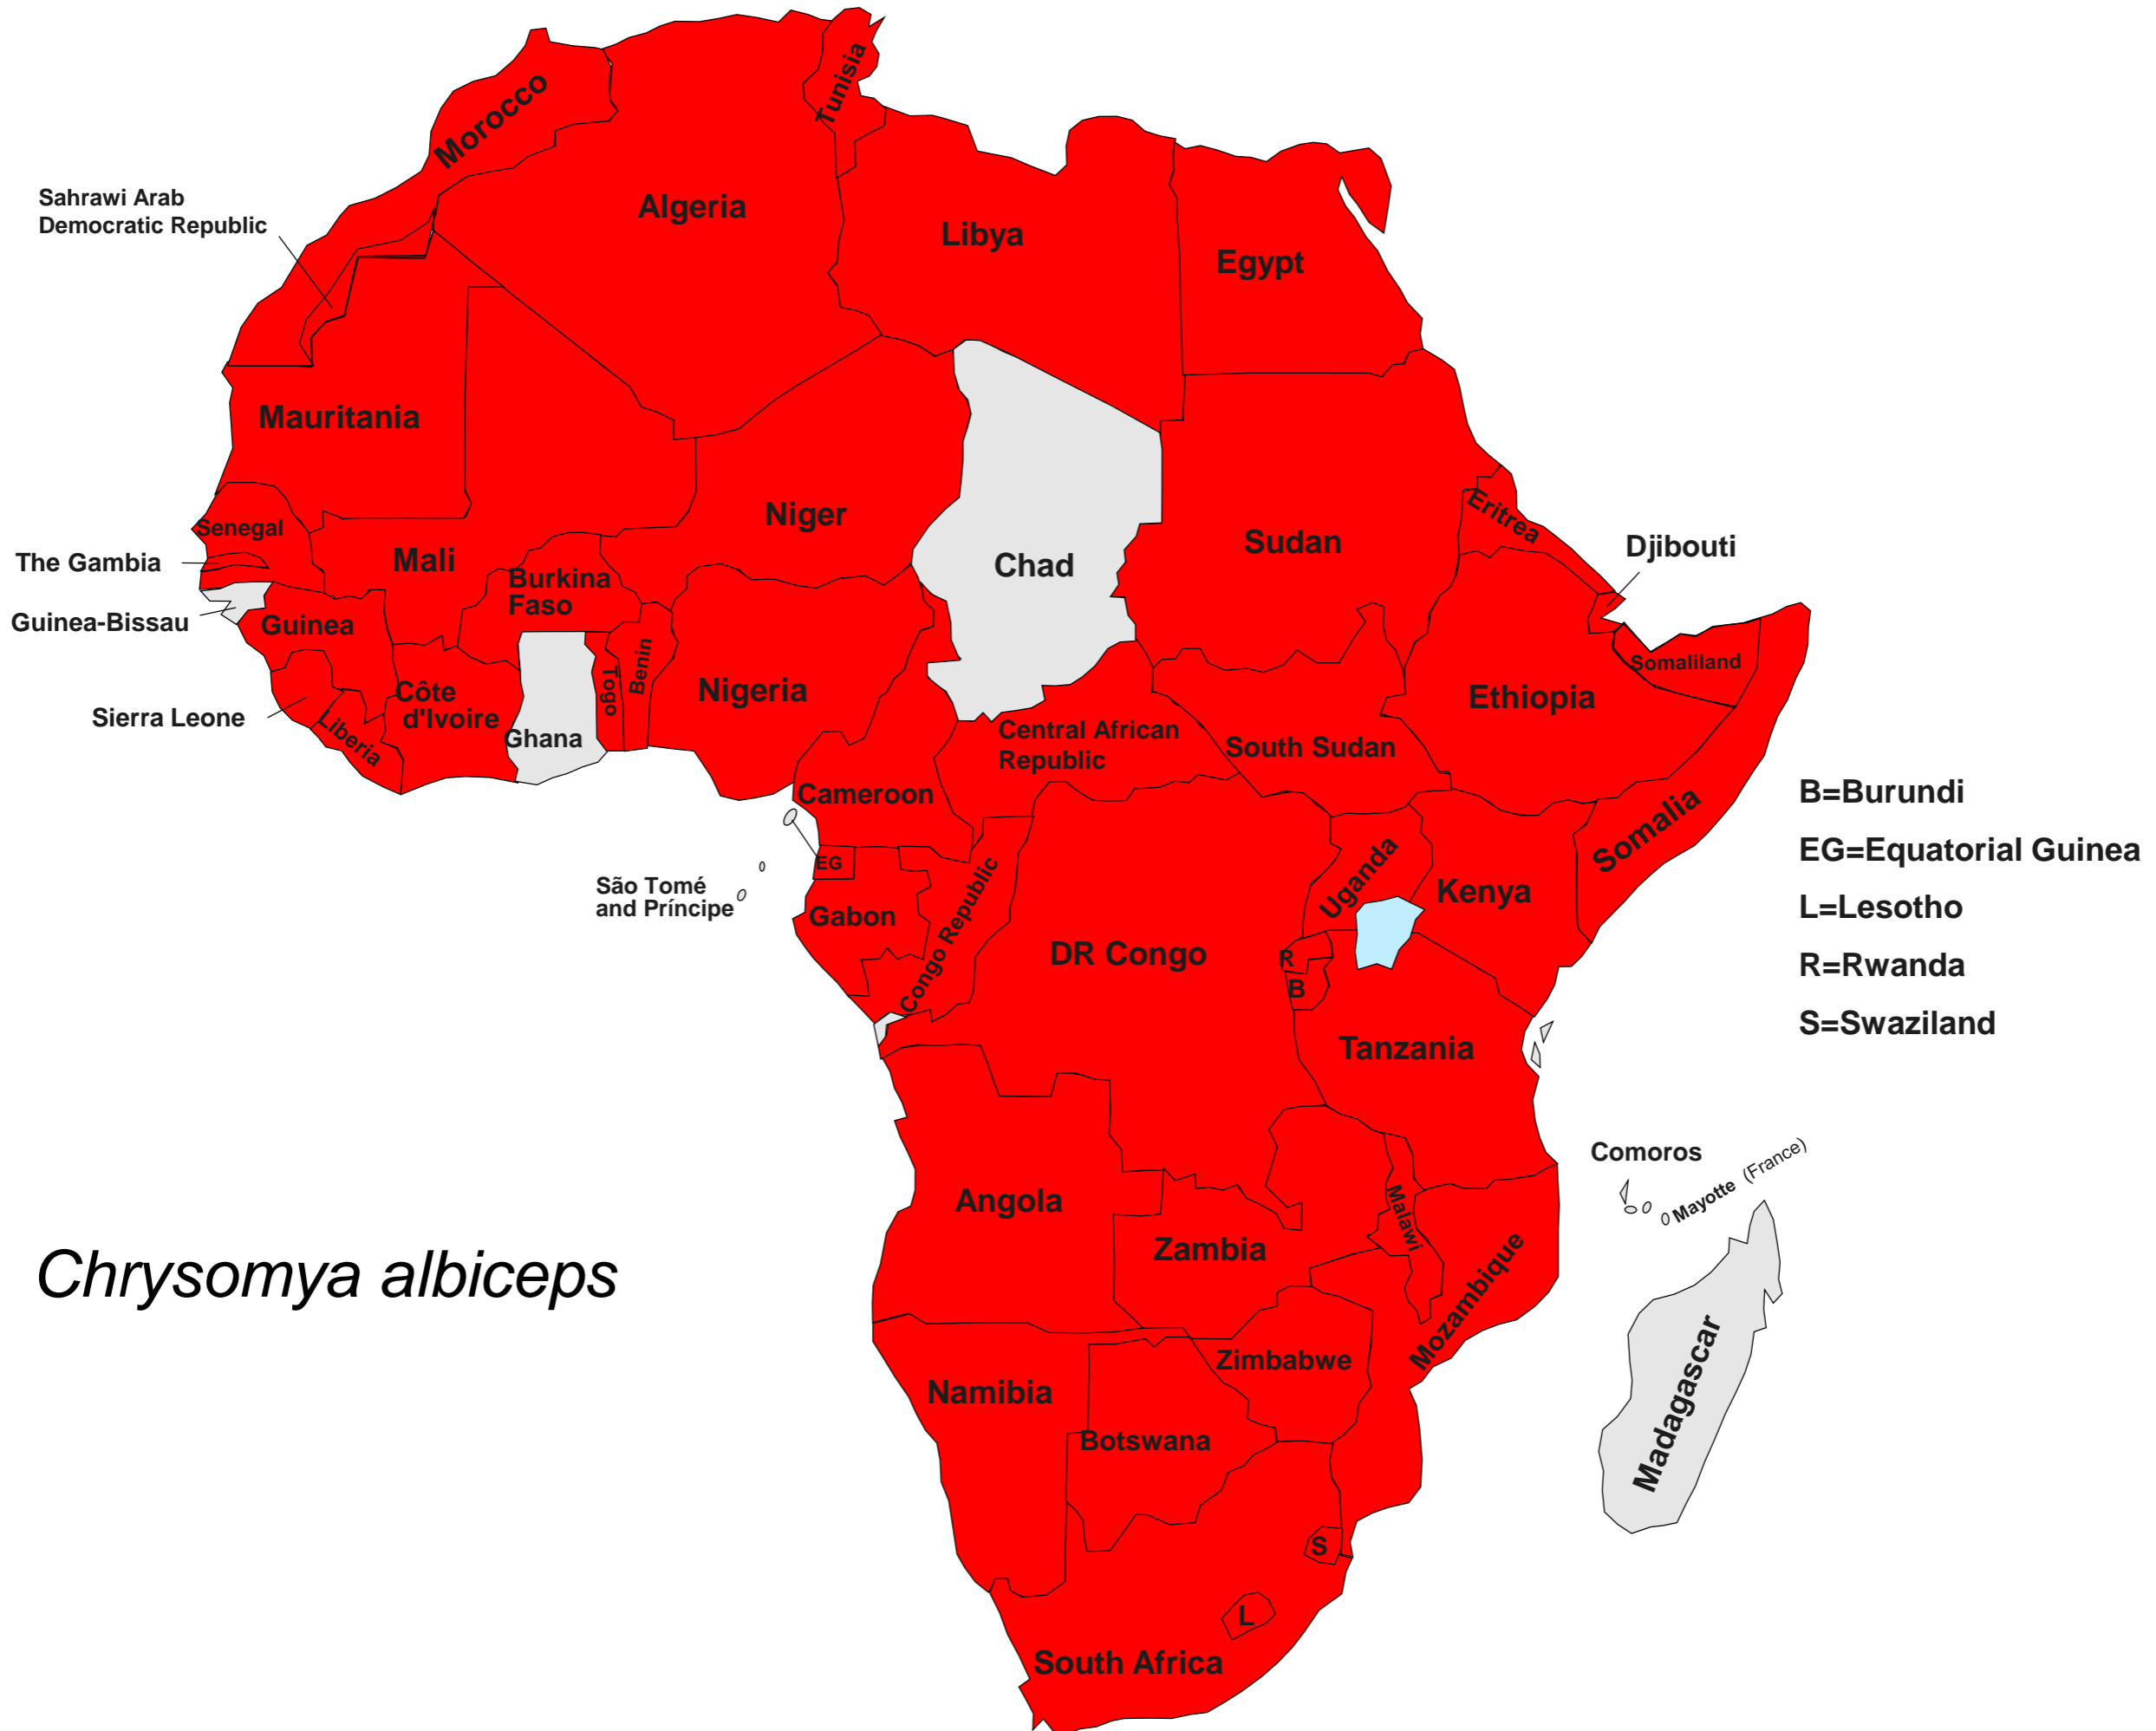

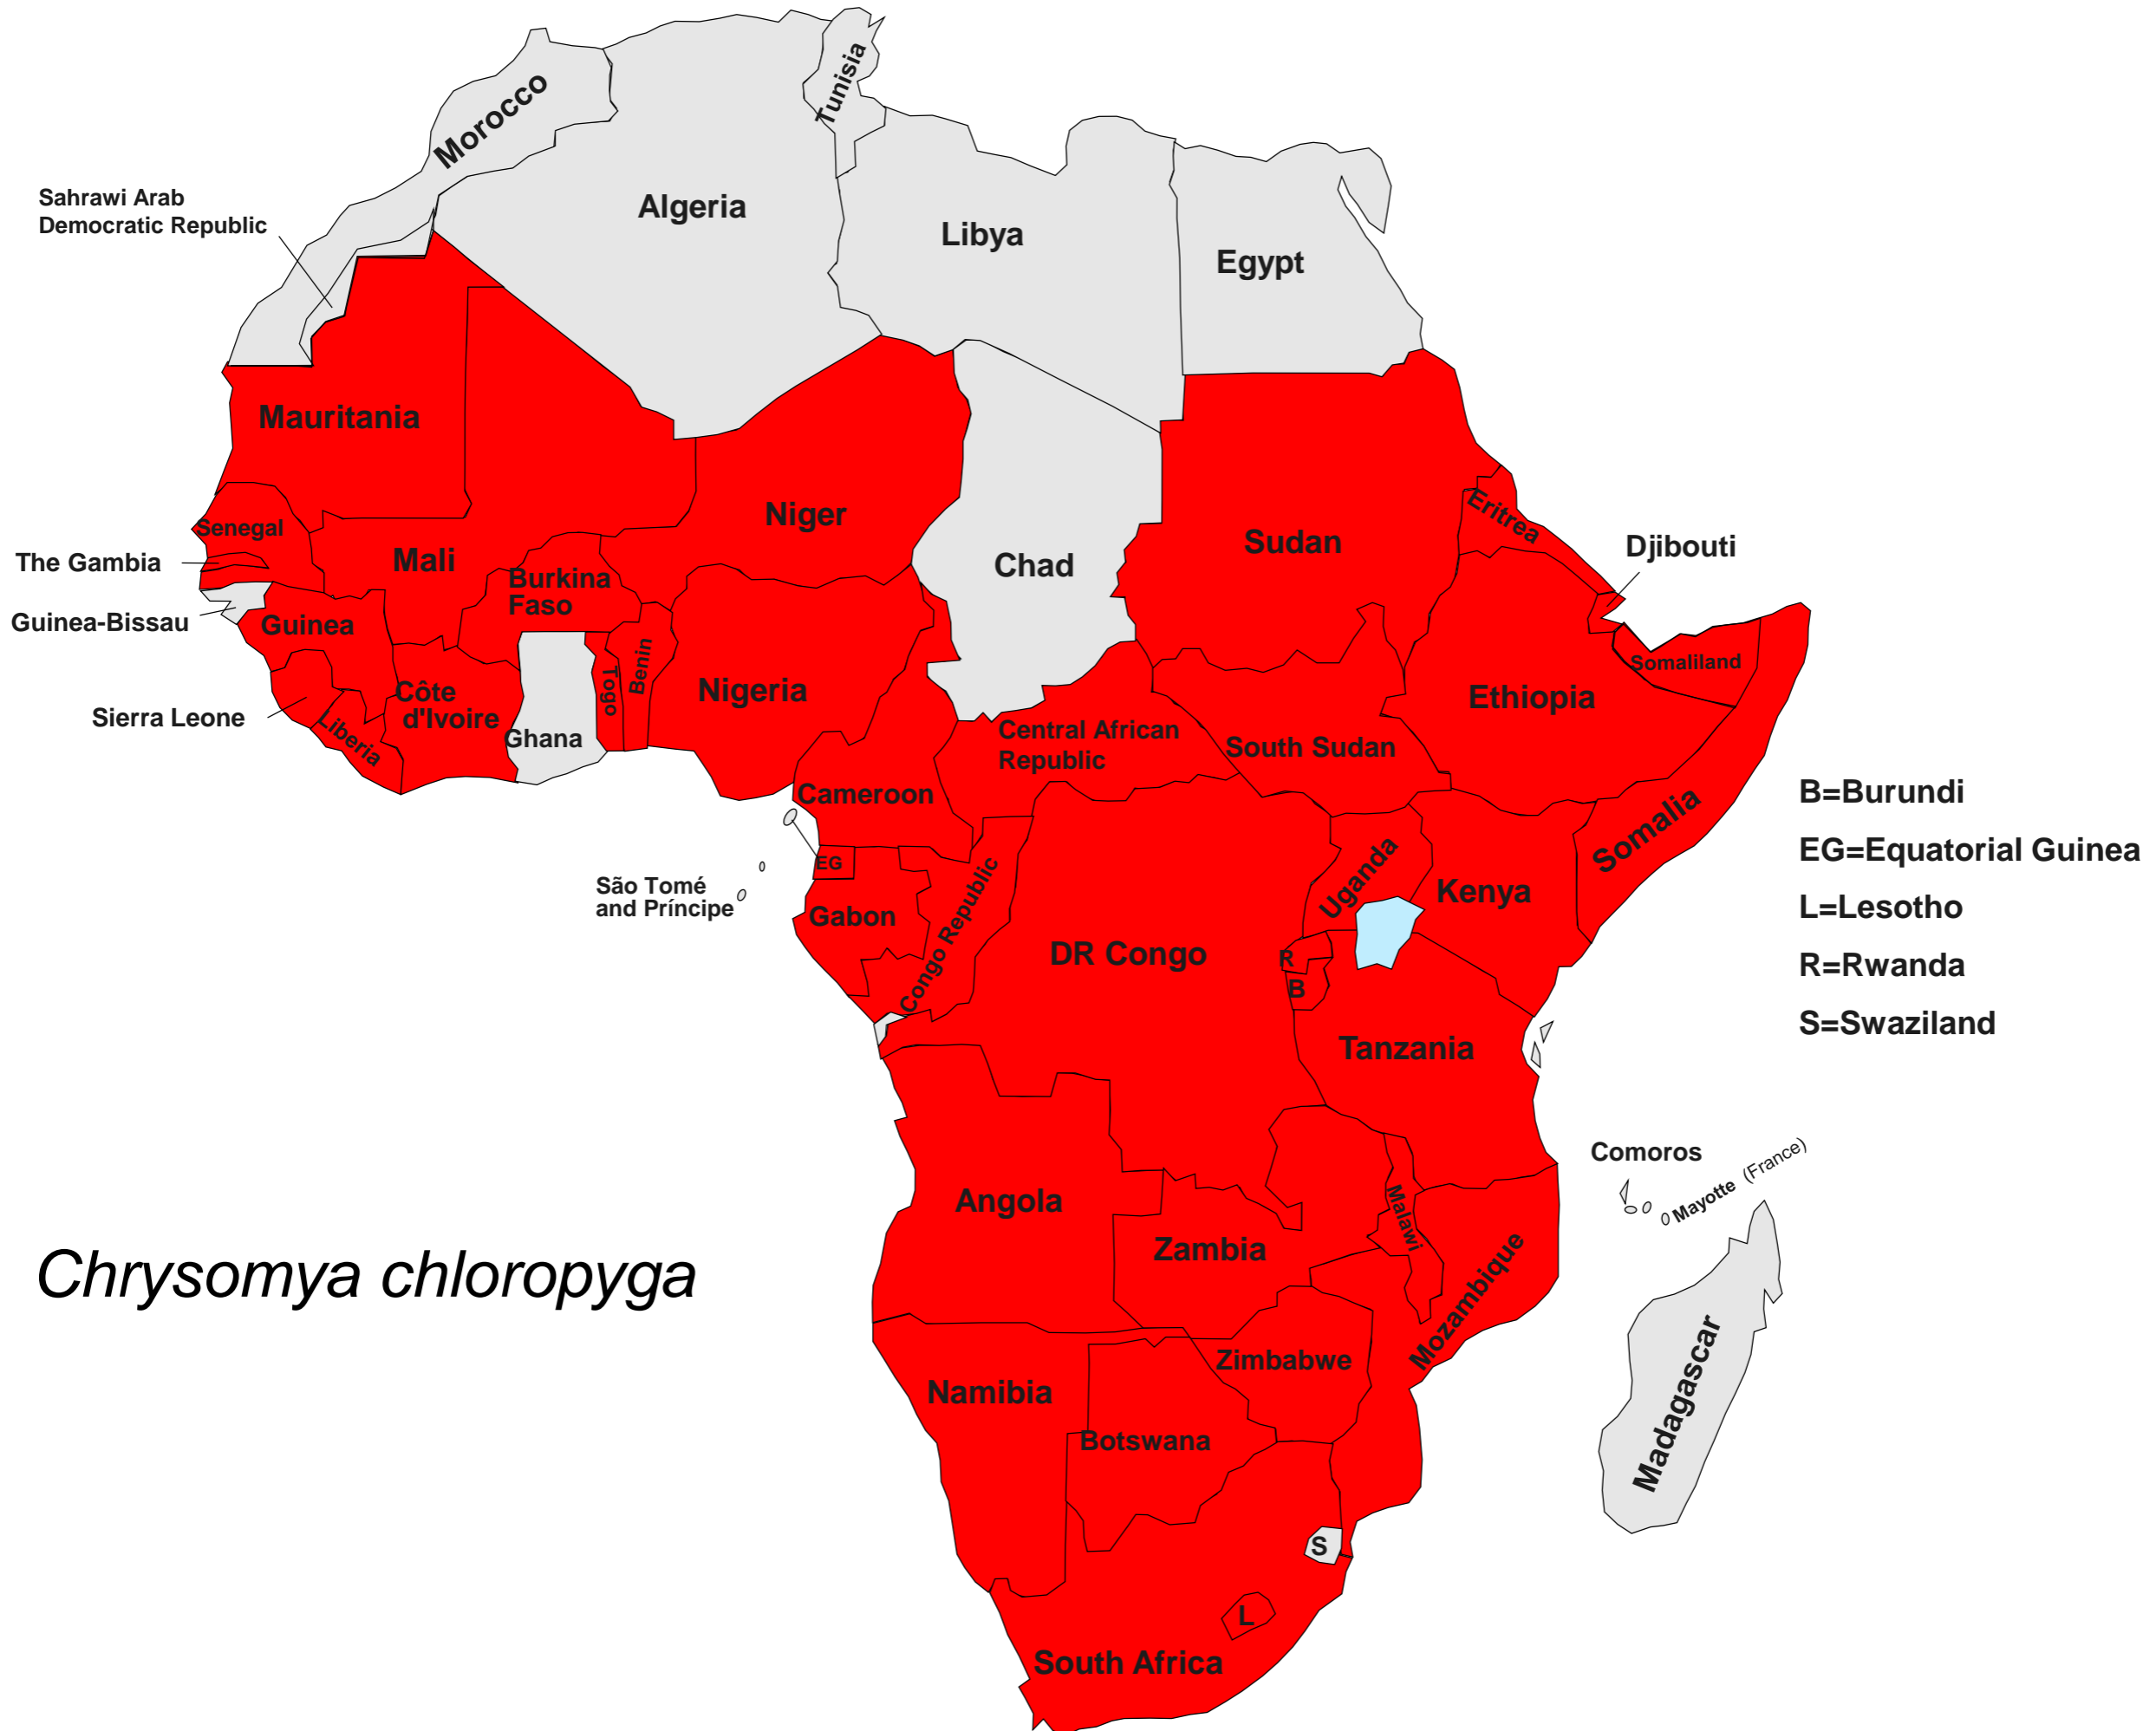

Sahrawi Arab Democratic Republic

Morocco

Tunisia

Algeria

Libya

Egypt

Mauritania

Senegal

The Gambia

Guinea-Bissau

Guinea

Mali

Burkina Faso

Niger

Chad

Sudan

Eritrea

Djibouti

Somaliland

Sierra Leone

Liberia

Côte d'Ivoire

Ghana

Togo

Benin

Nigeria

Central African Republic

South Sudan

Ethiopia

B=Burundi

EG=Equatorial Guinea

L=Lesotho

R=Rwanda

S=Swaziland

São Tomé and Príncipe

Cameroon

EG

Gabon

Congo Republic

DR Congo

R

B

Uganda

Kenya

Somalia

Comoros

Mayotte (France)

Angola

Zambia

Malawi

Tanzania

Mozambique

Namibia

Zimbabwe

Botswana

S

L

South Africa

Madagascar

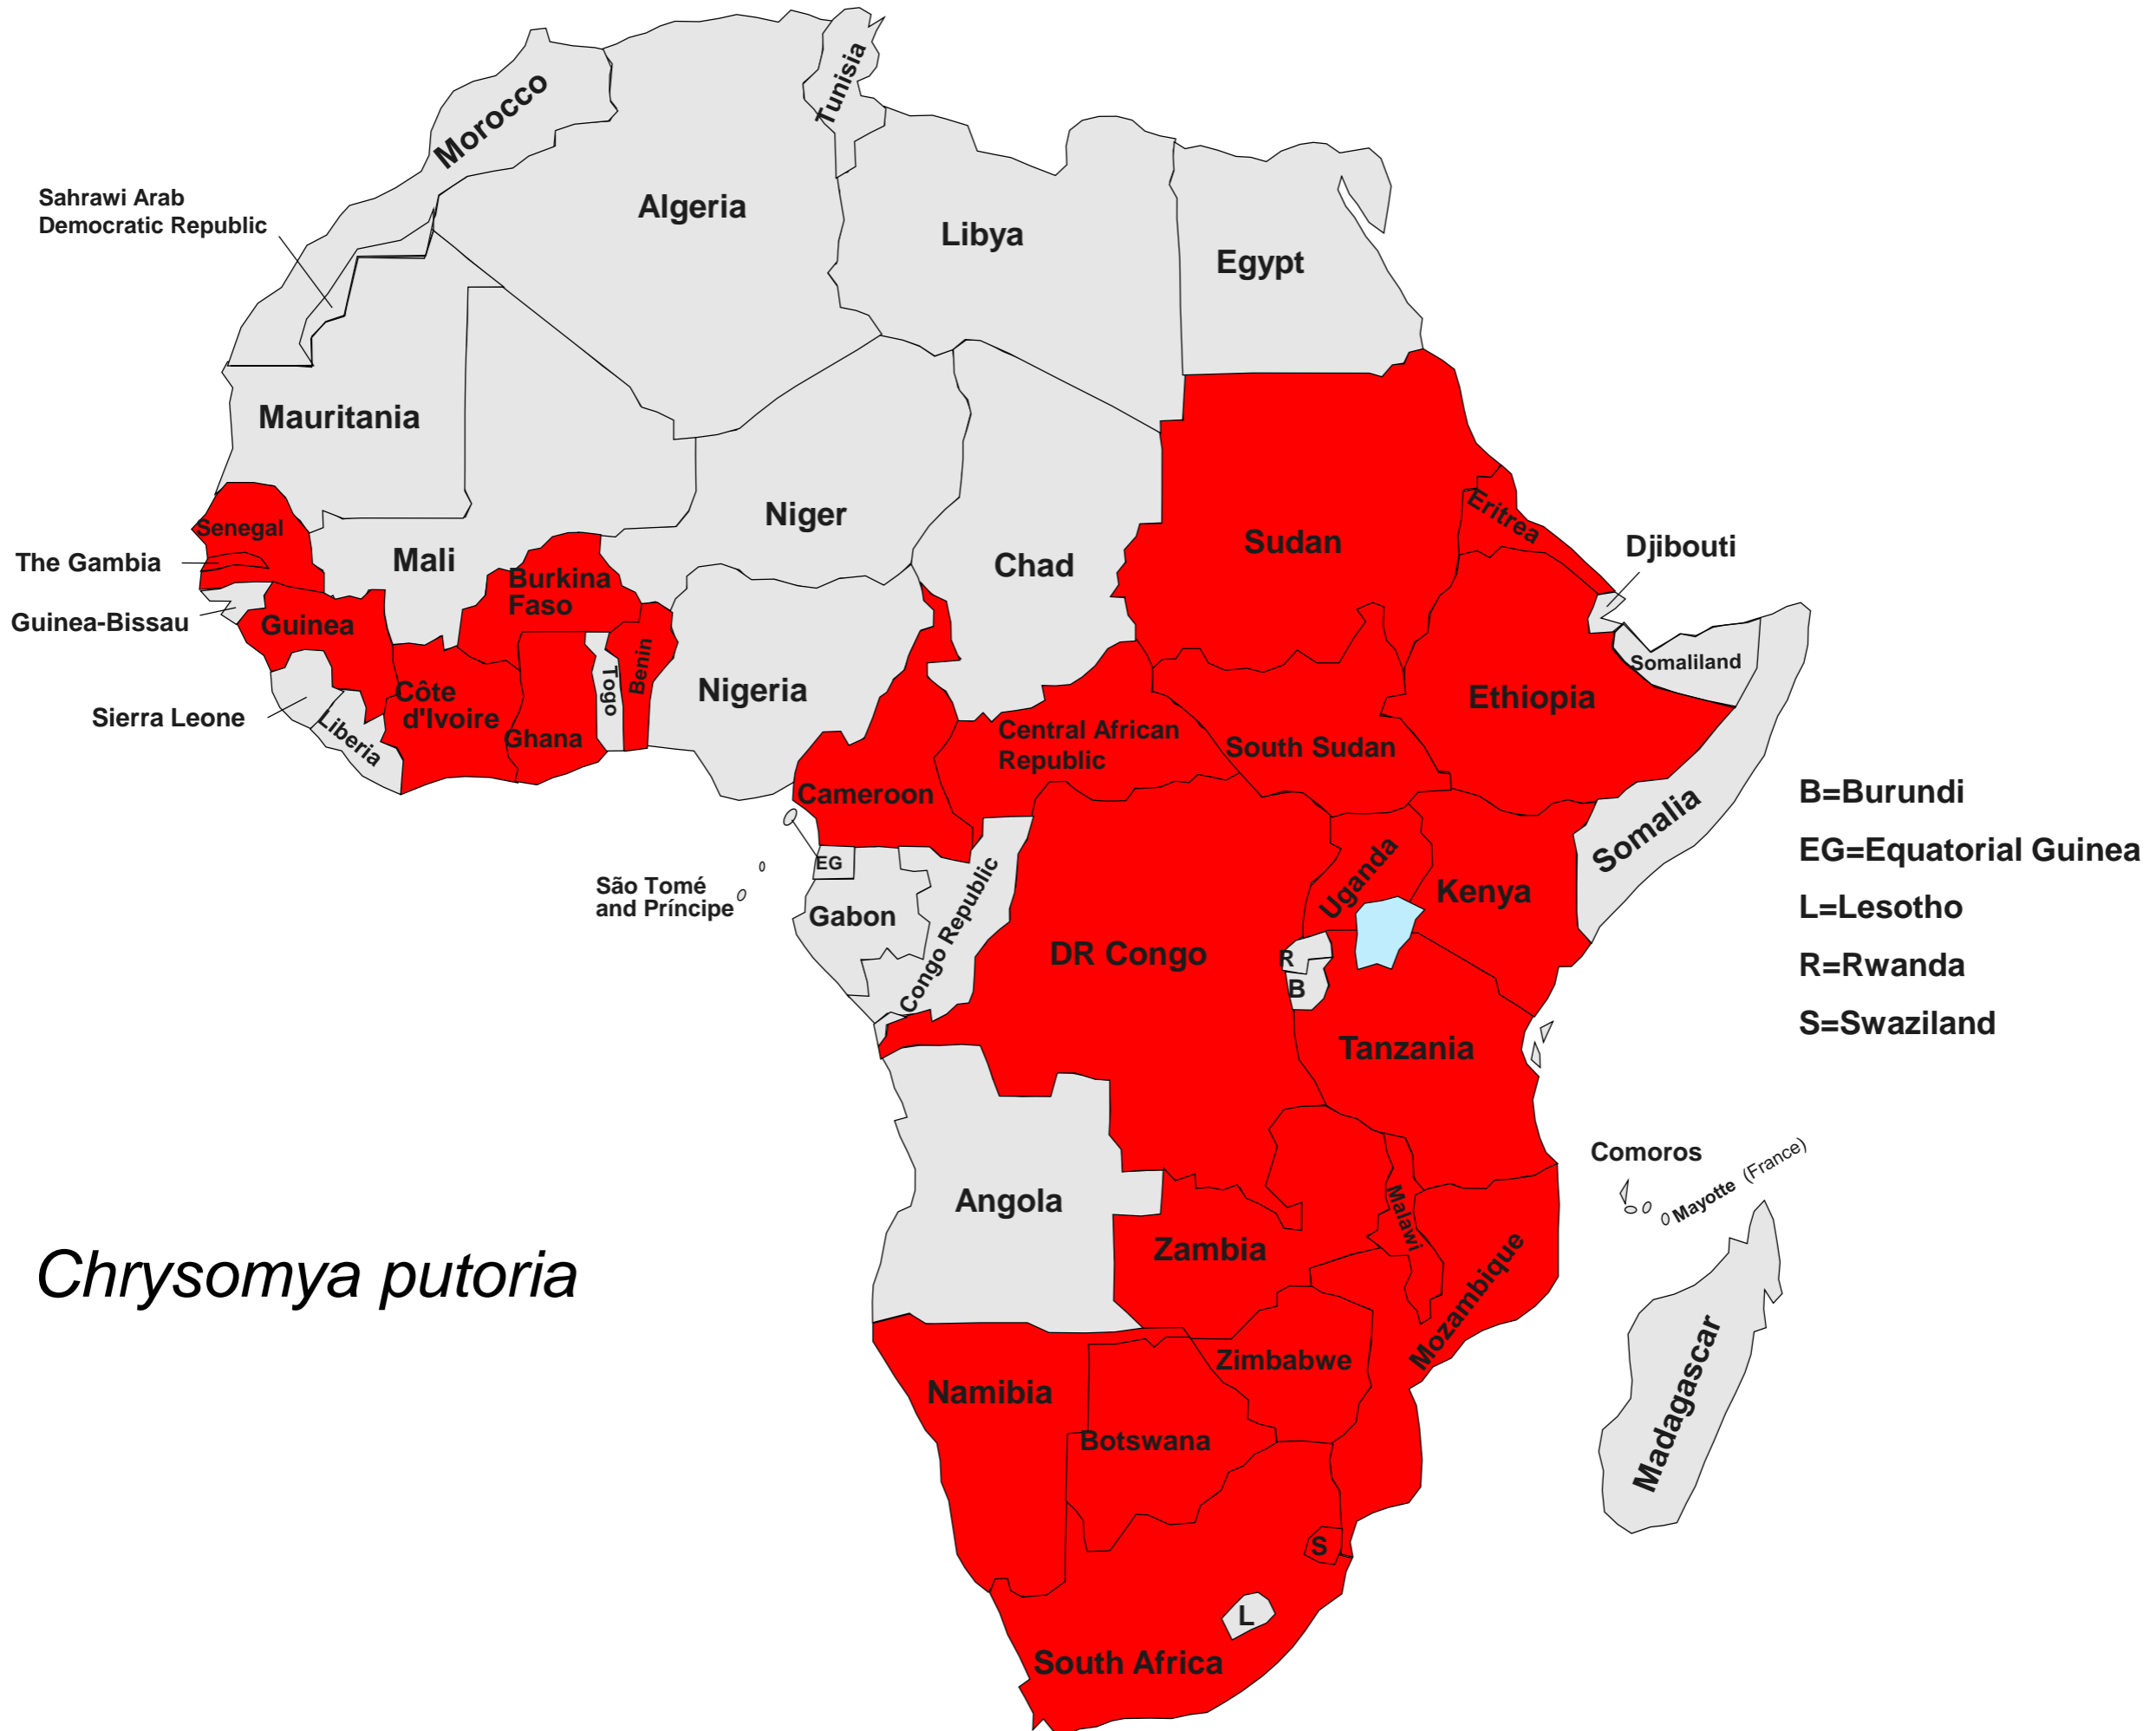

*Chrysomya putoria*



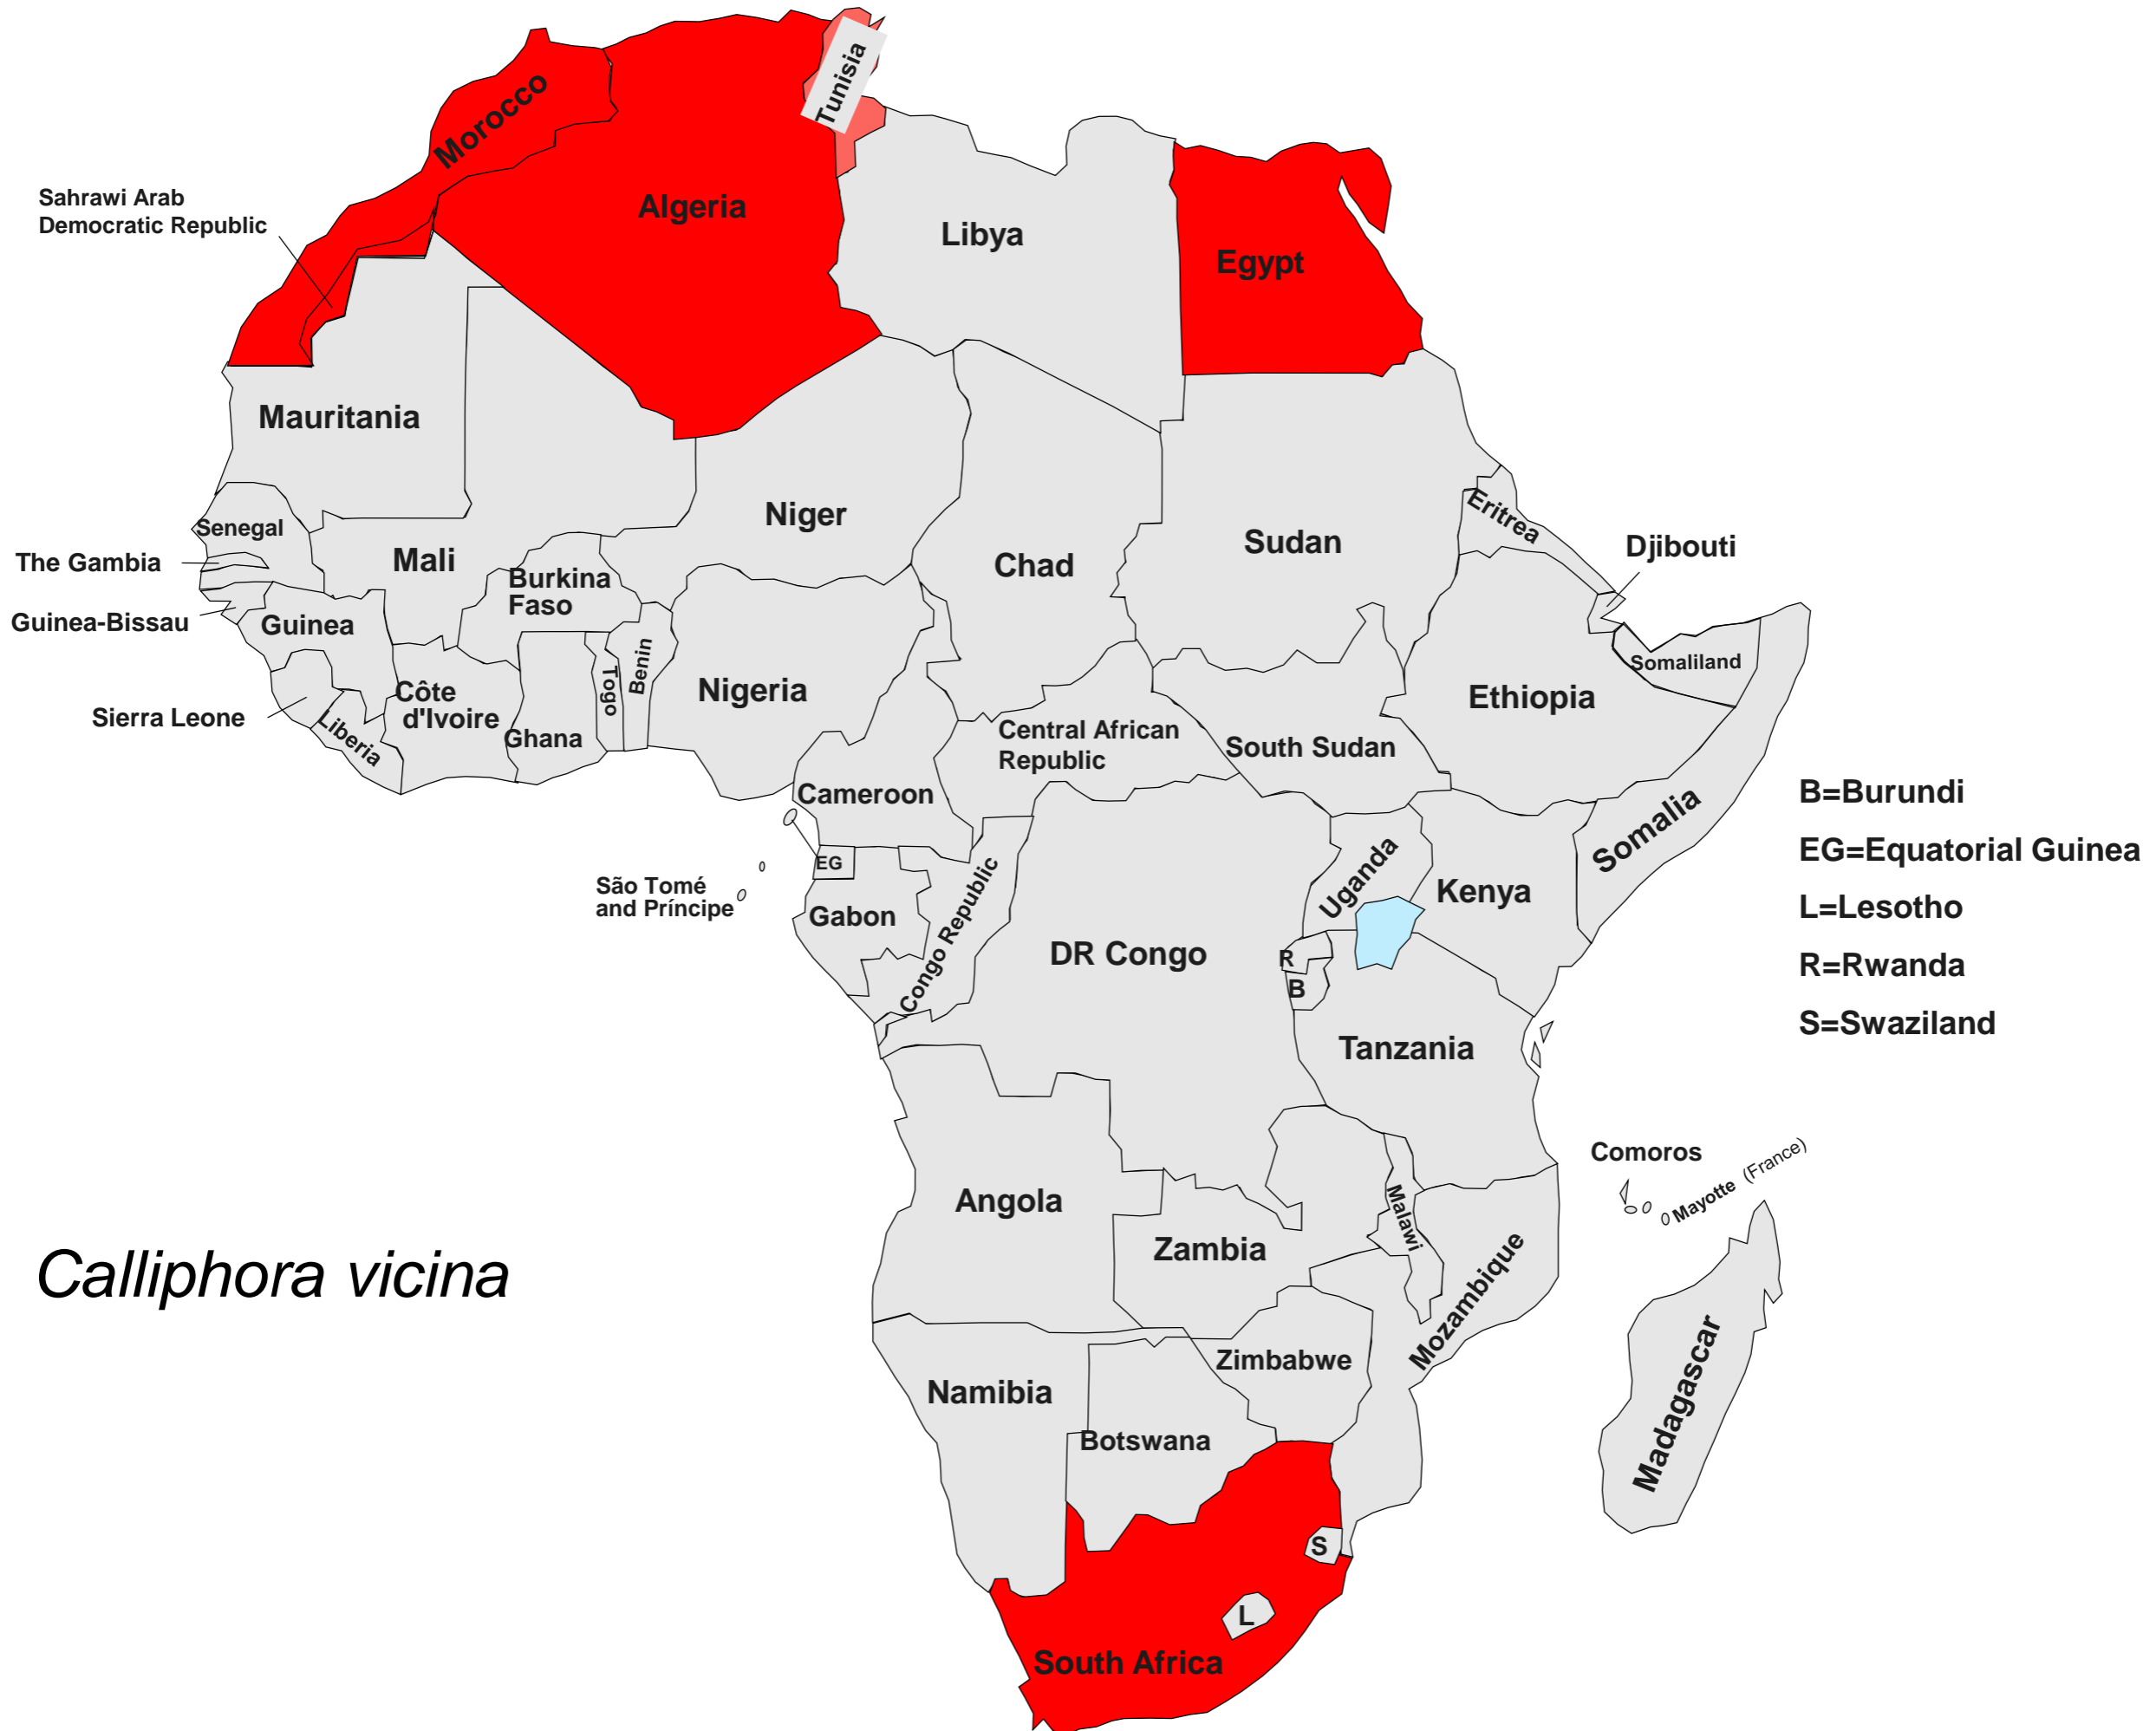

Sahrawi Arab Democratic Republic

Morocco

Tunisia

Algeria

Libya

Egypt

Mauritania

The Gambia

Senegal

Mali

Niger

Chad

Sudan

Eritrea

Djibouti

Guinea-Bissau

Guinea

Burkina Faso

Nigeria

Central African Republic

South Sudan

Ethiopia

Somaliland

Sierra Leone

Liberia

Côte d'Ivoire

Ghana

Togo

Benin

Cameroon

EG

Gabon

São Tomé and Príncipe

Congo Republic

DR Congo

R  
B

Uganda

Kenya

Somalia

B=Burundi

EG=Equatorial Guinea

L=Lesotho

R=Rwanda

S=Swaziland

Comoros

Mayotte (France)

Angola

Zambia

Malawi

Tanzania

Mozambique

0

Madagascar

Namibia

Zimbabwe

Botswana

S

L

South Africa

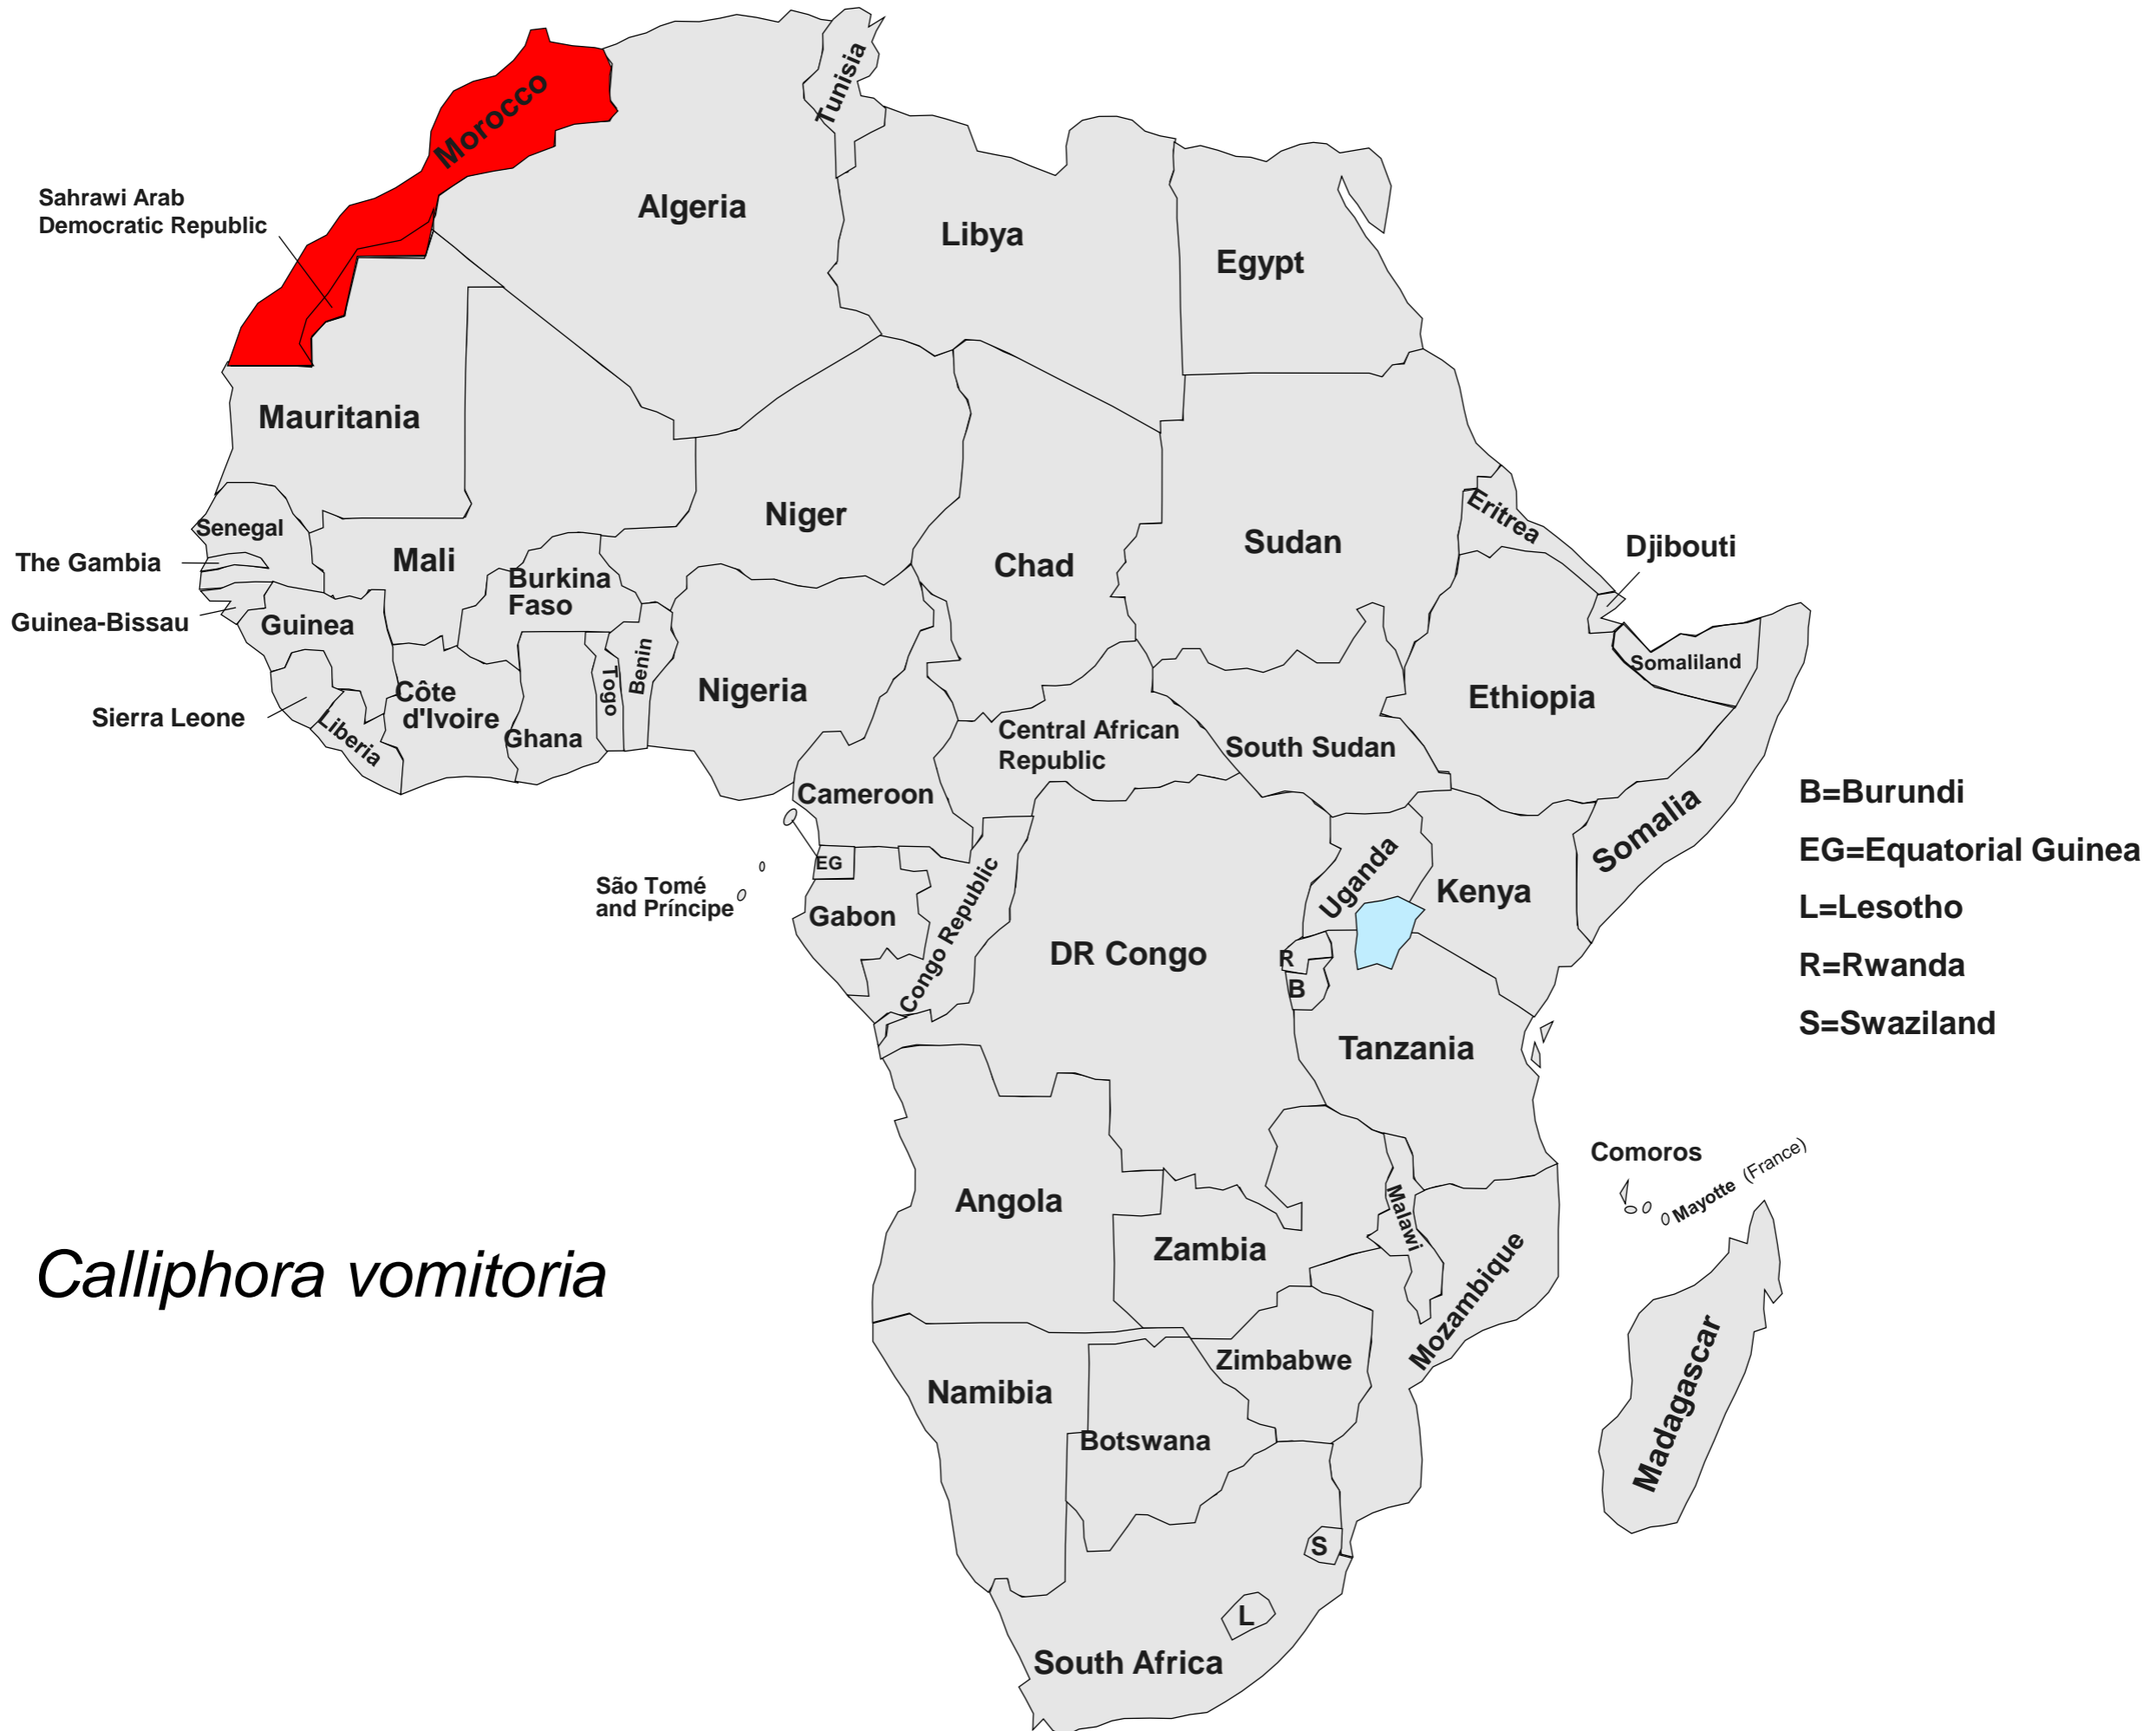

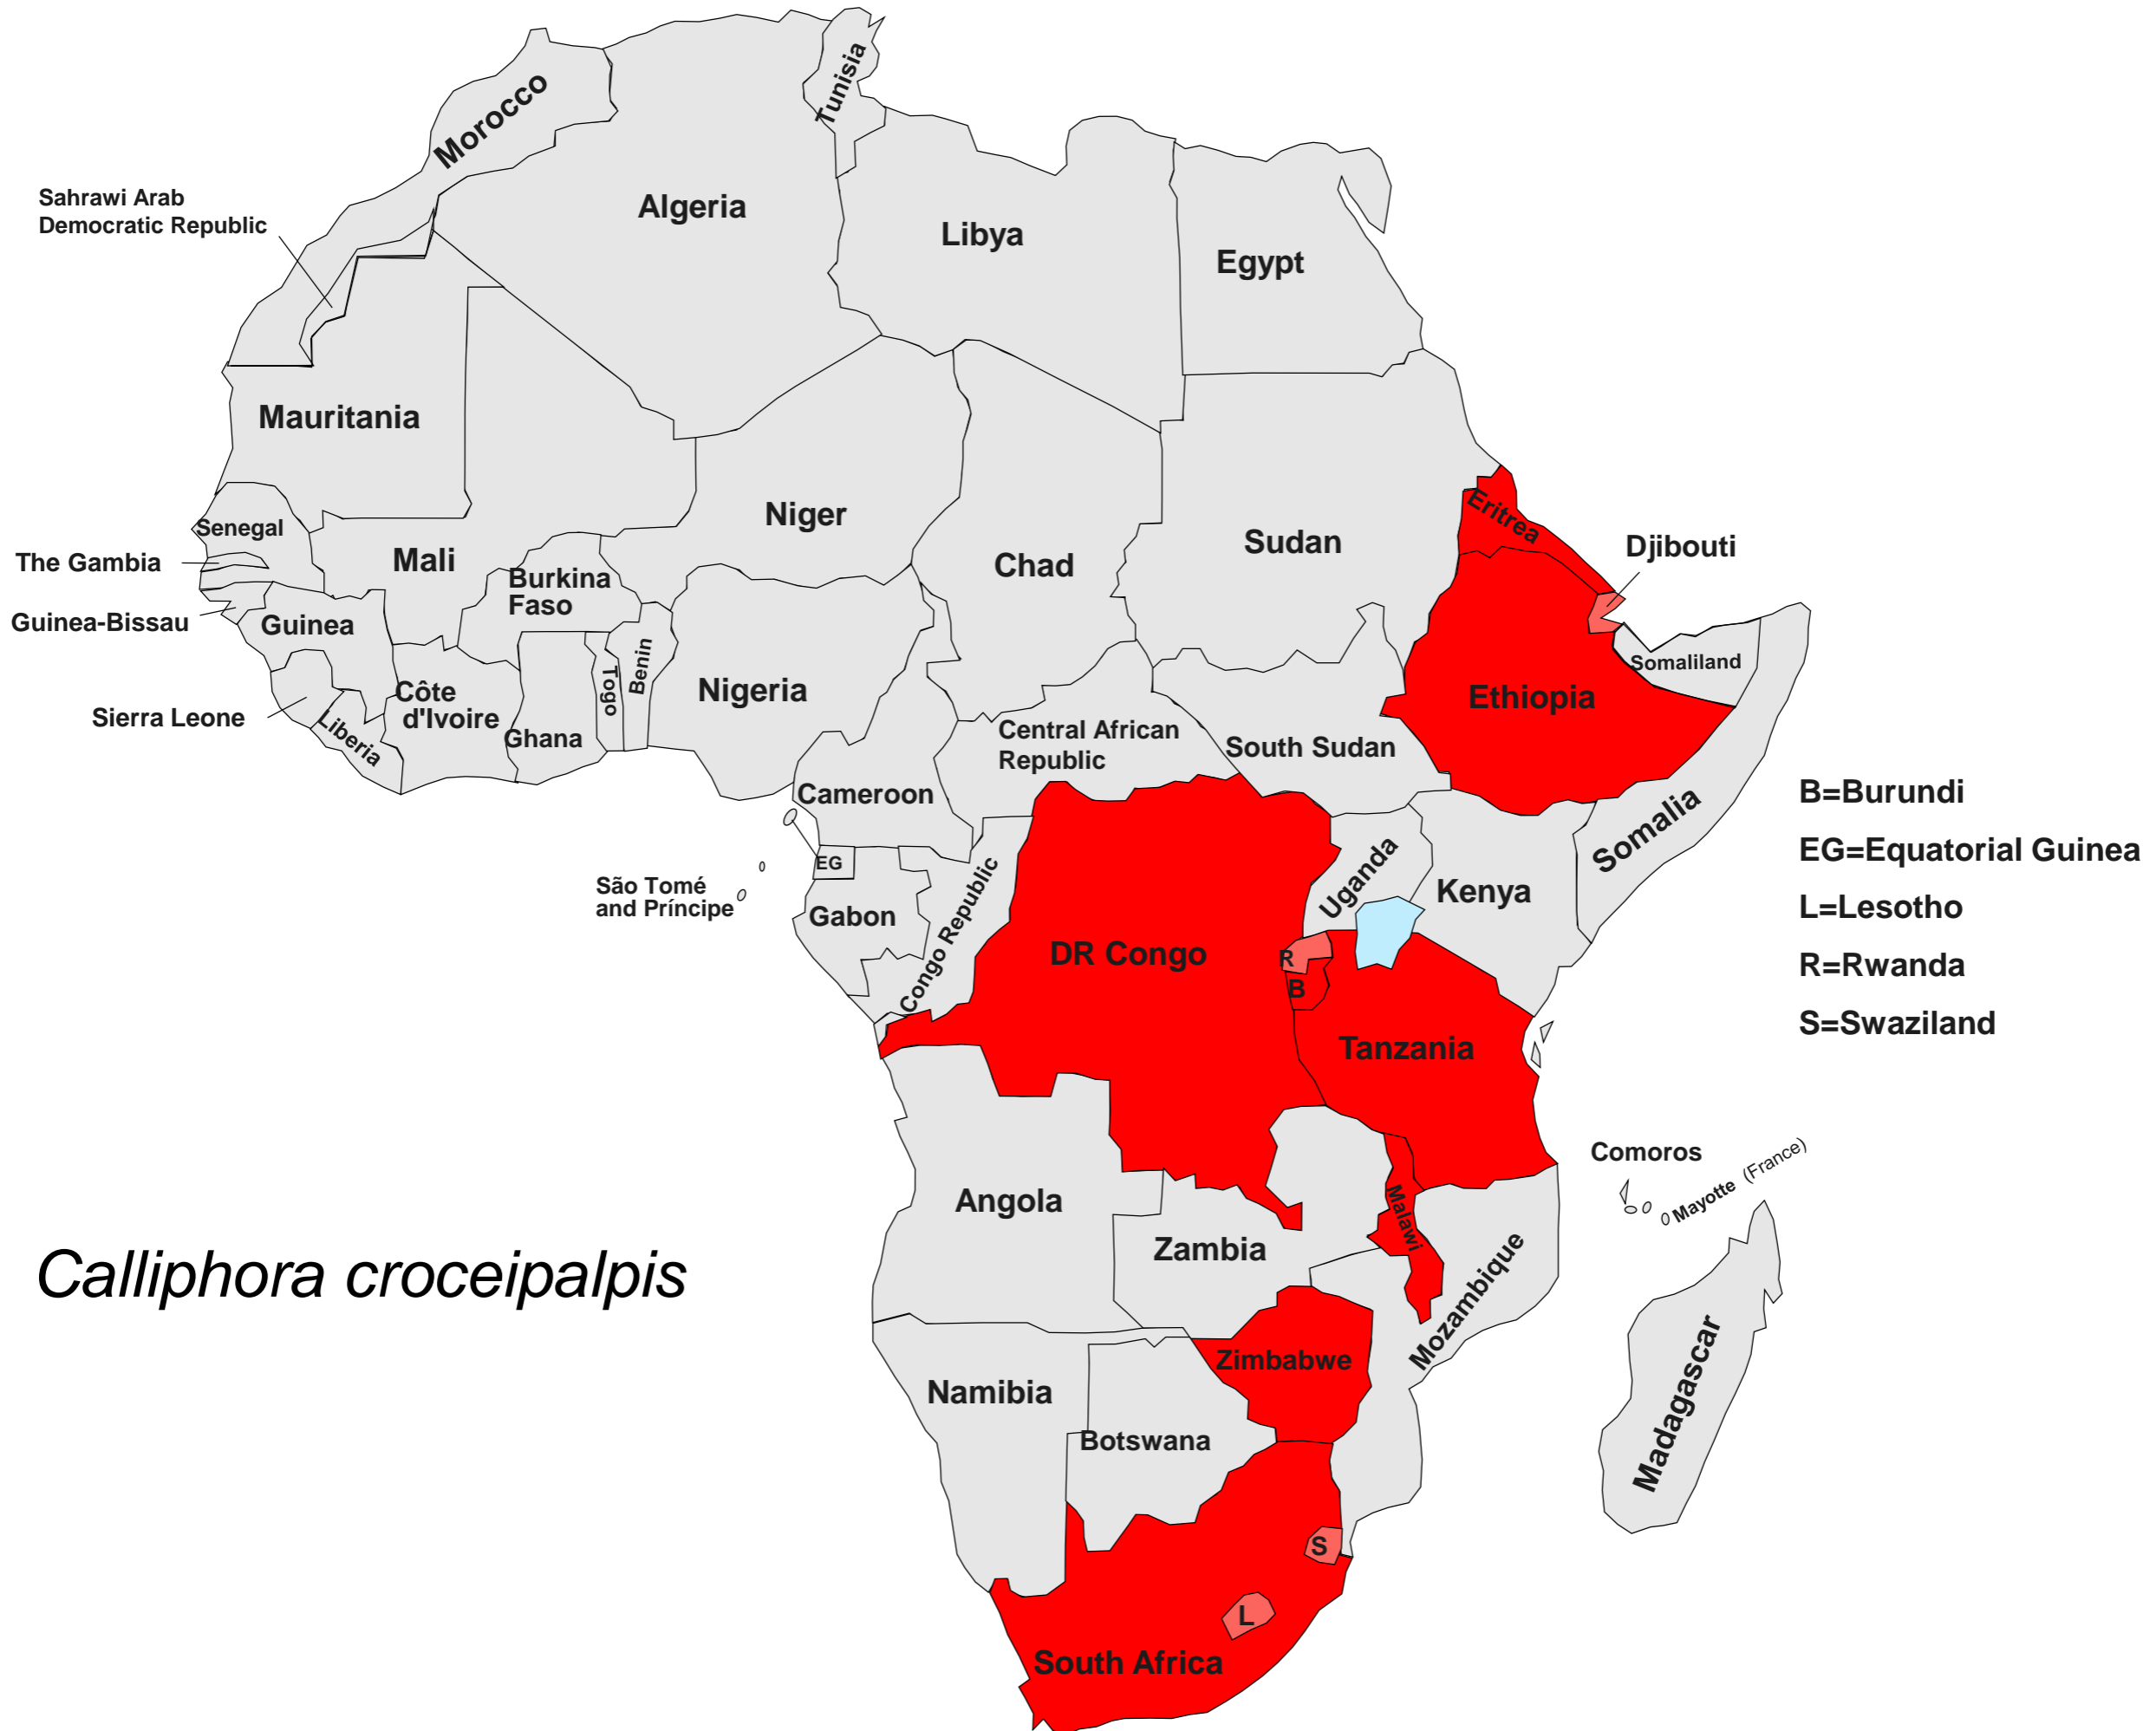

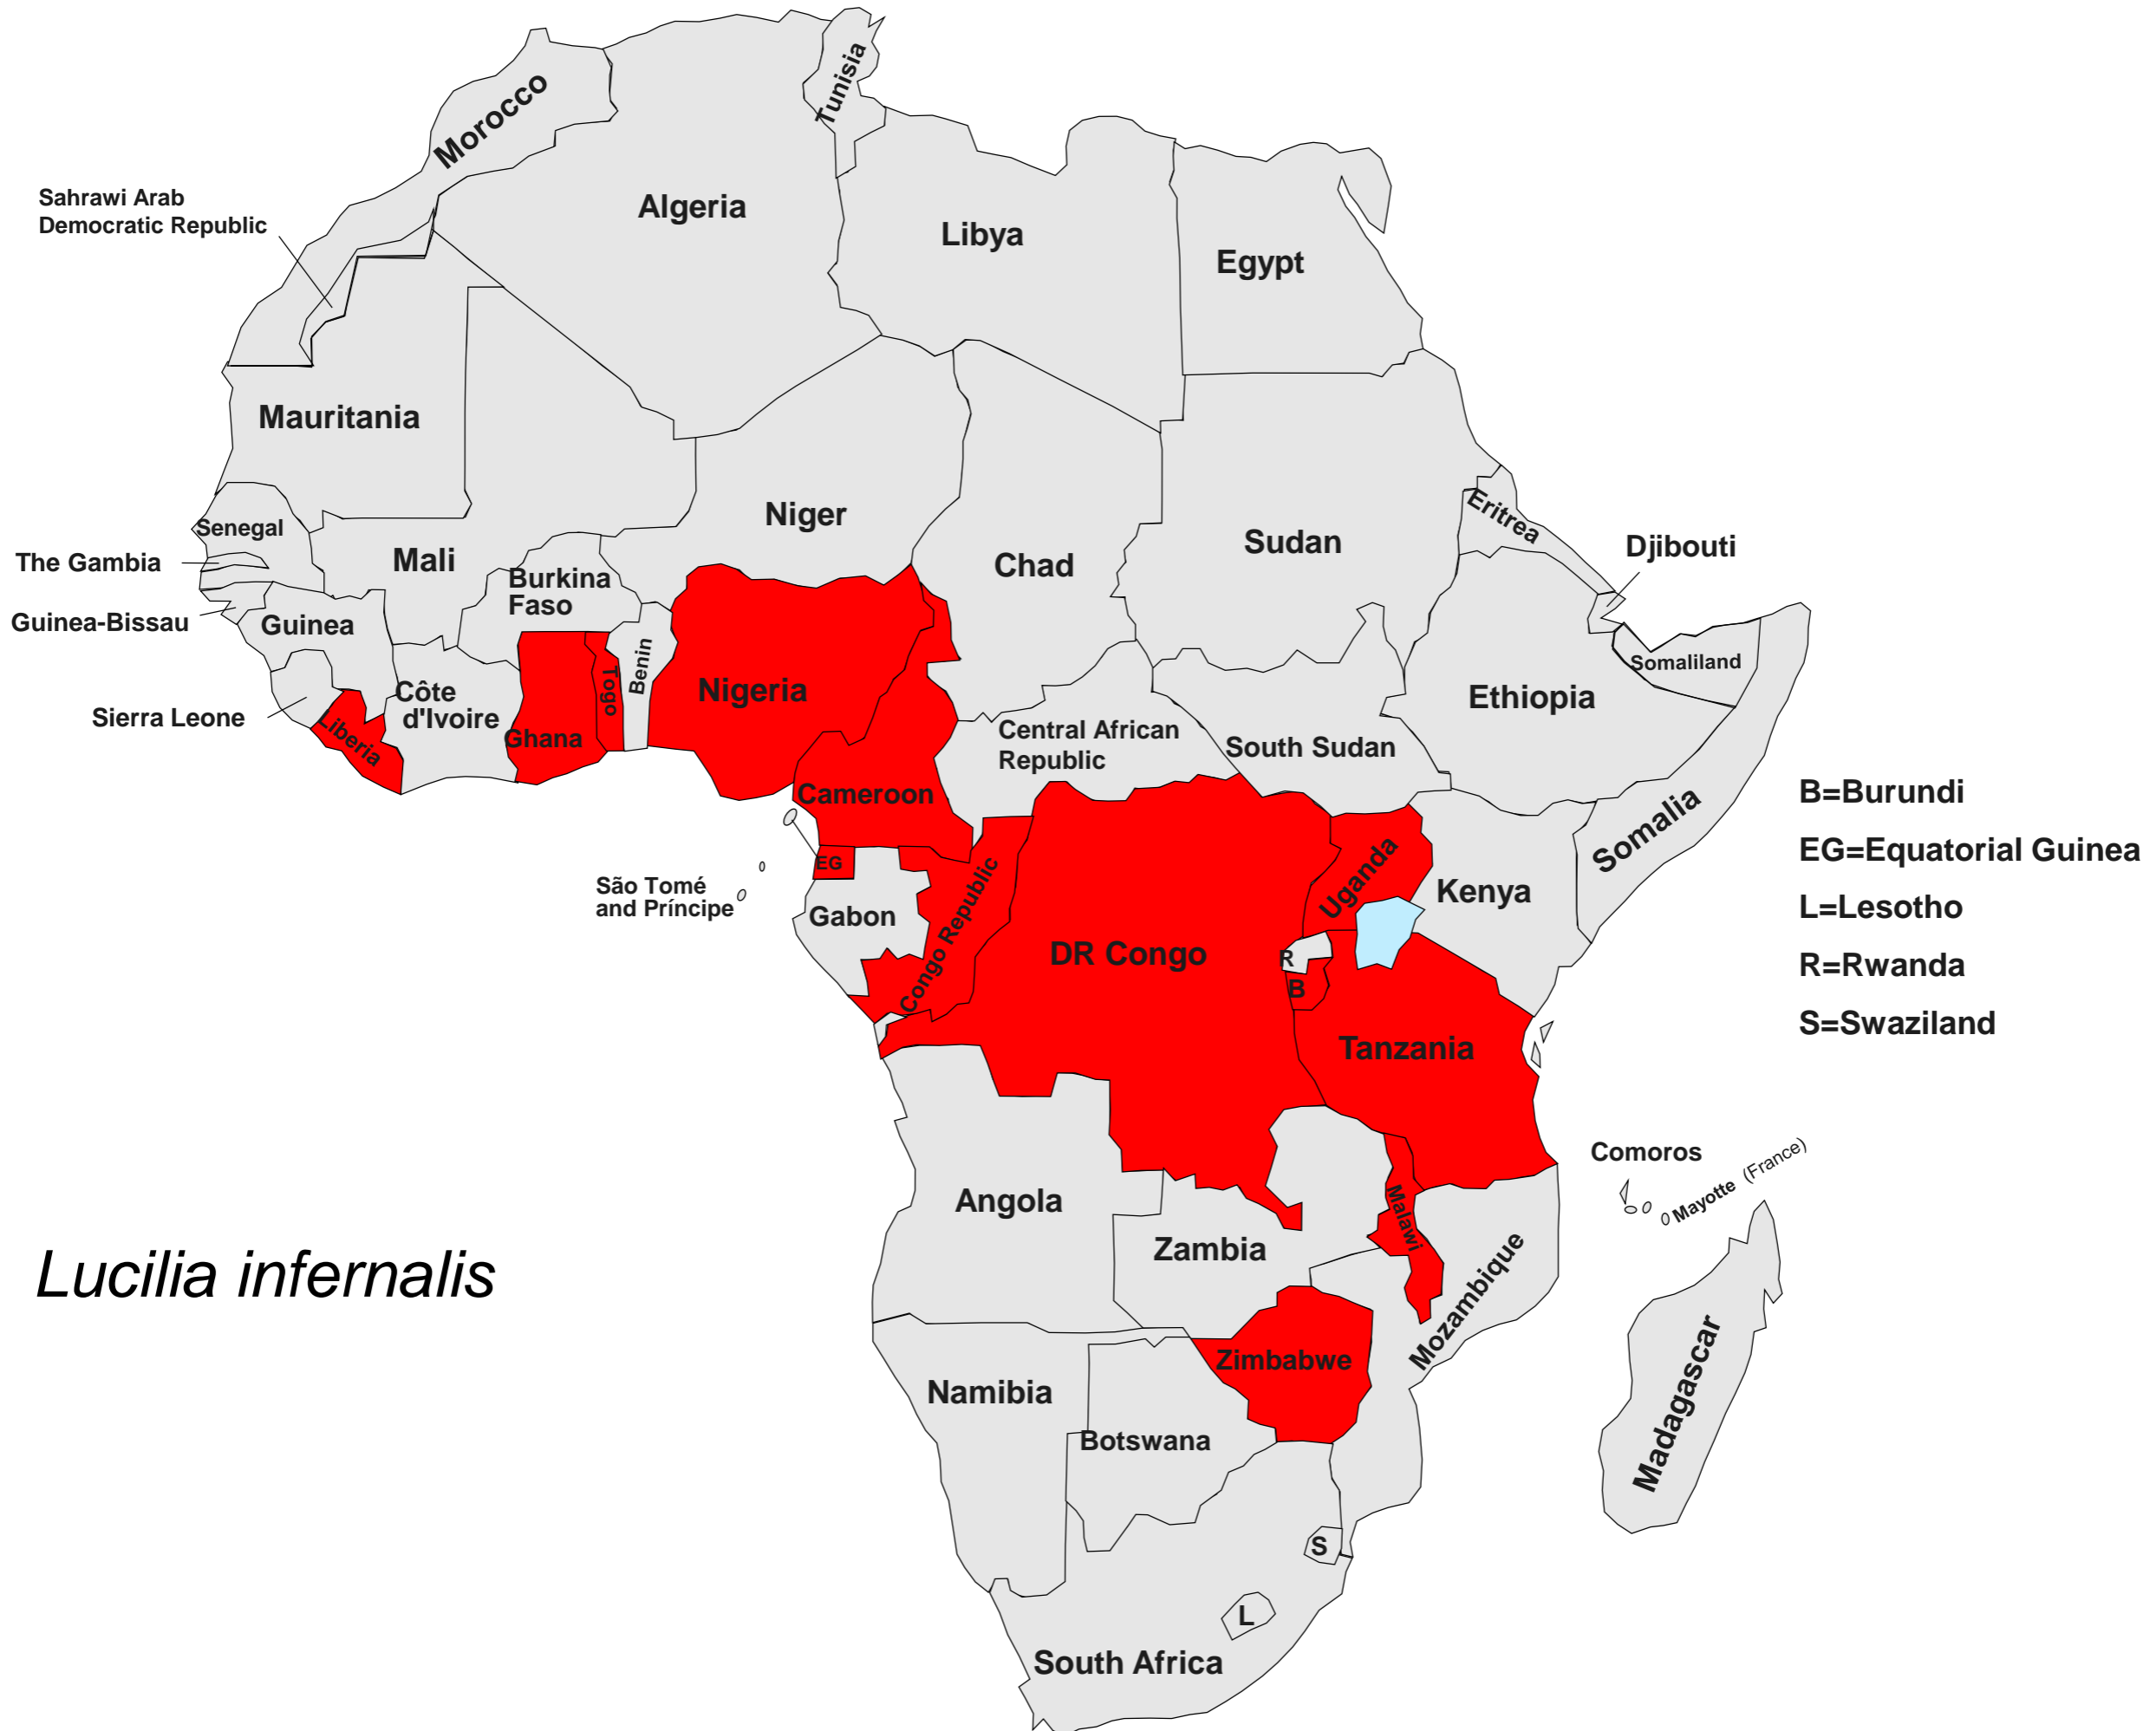

*Lucilia infernalis*

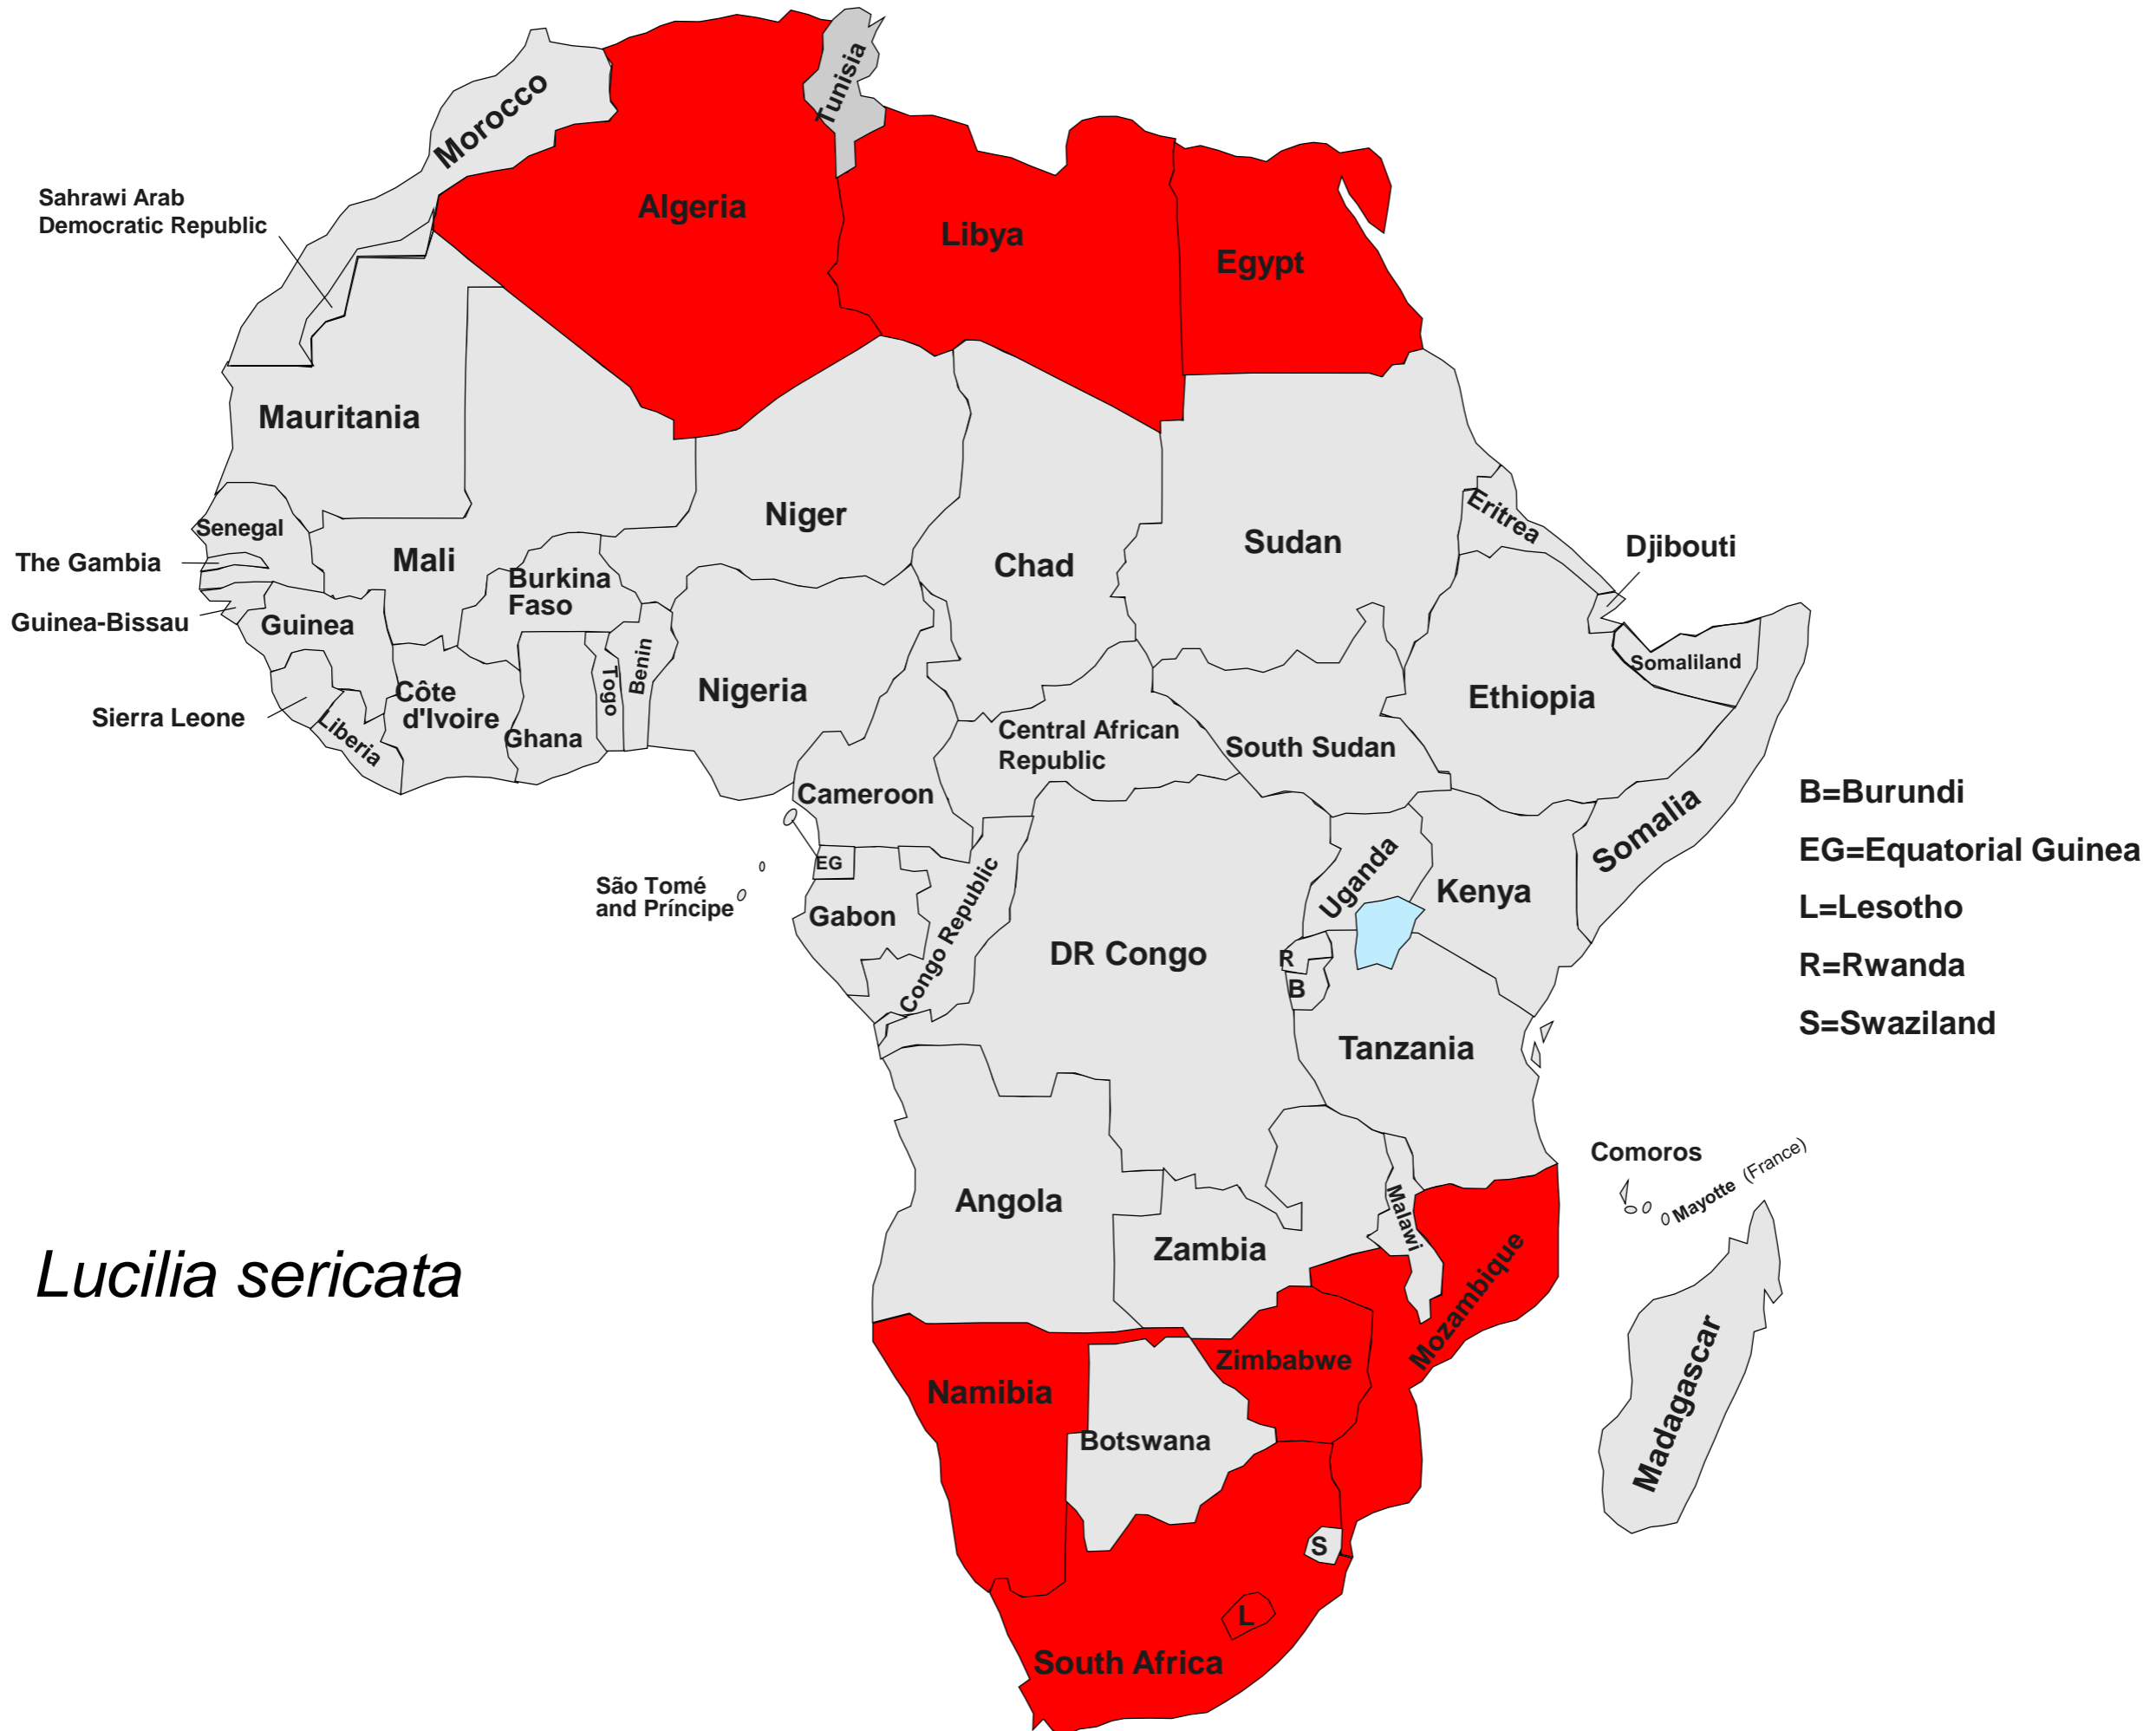

*Lucilia sericata*

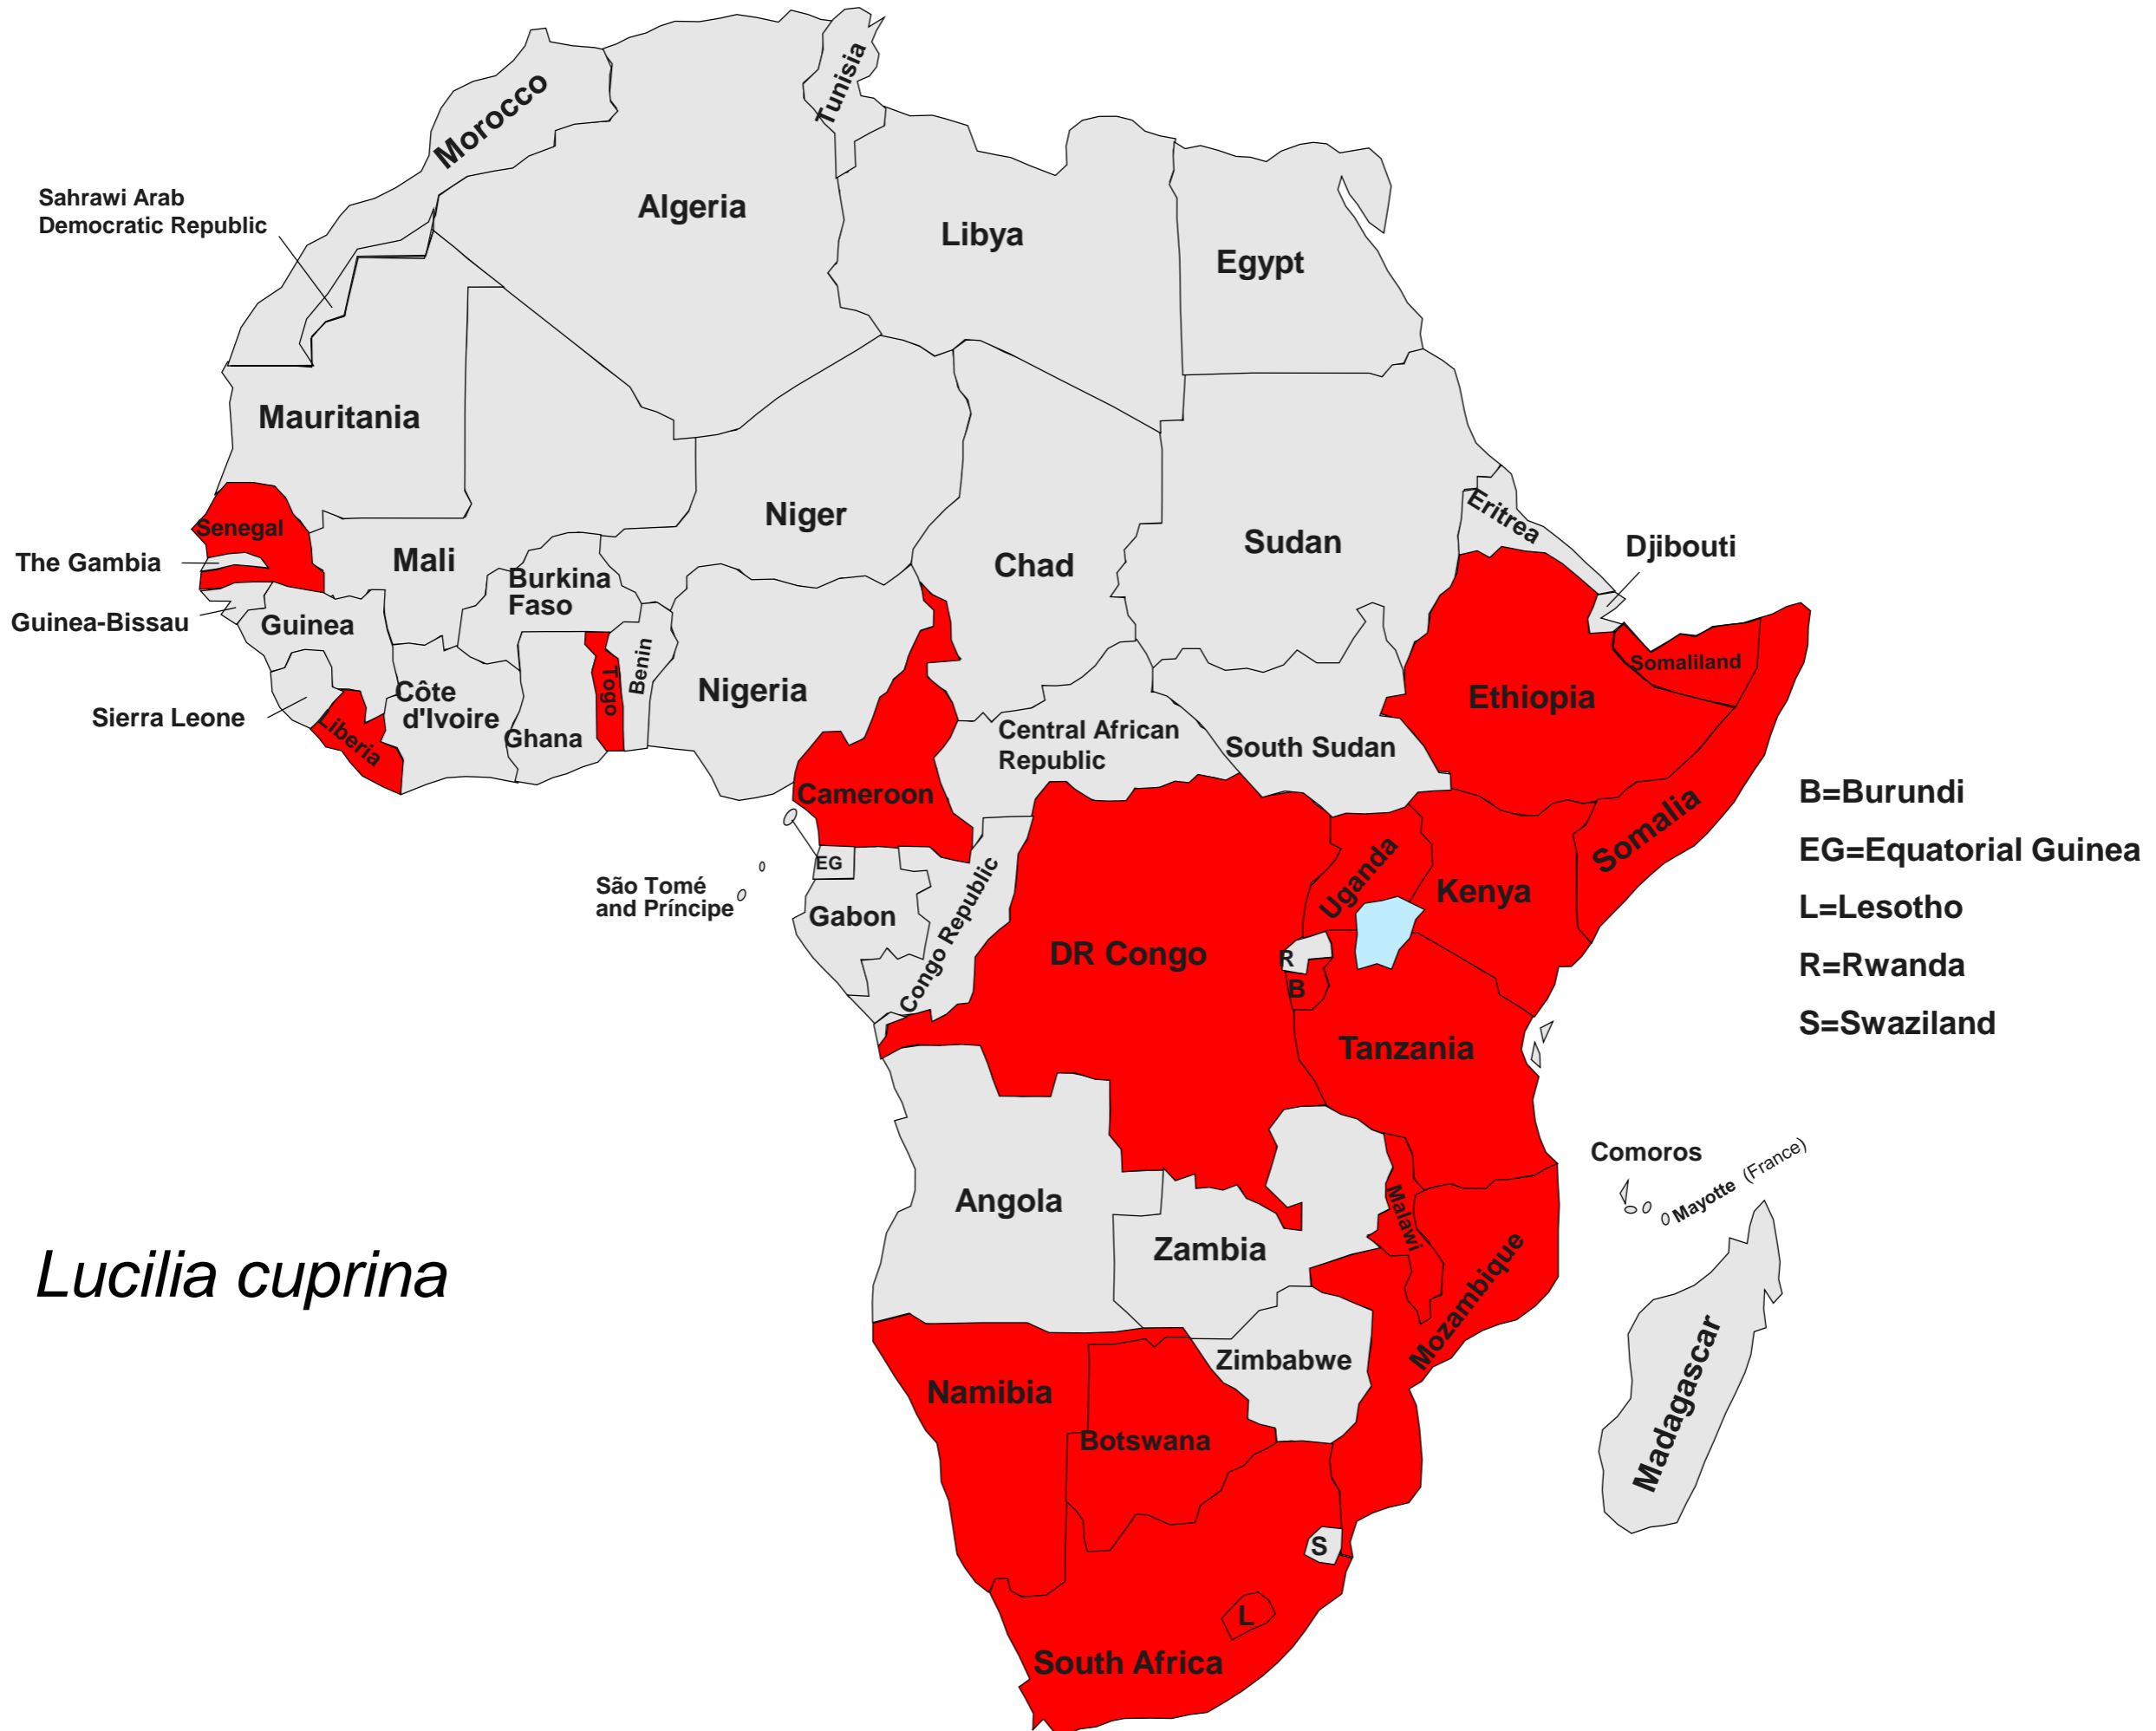

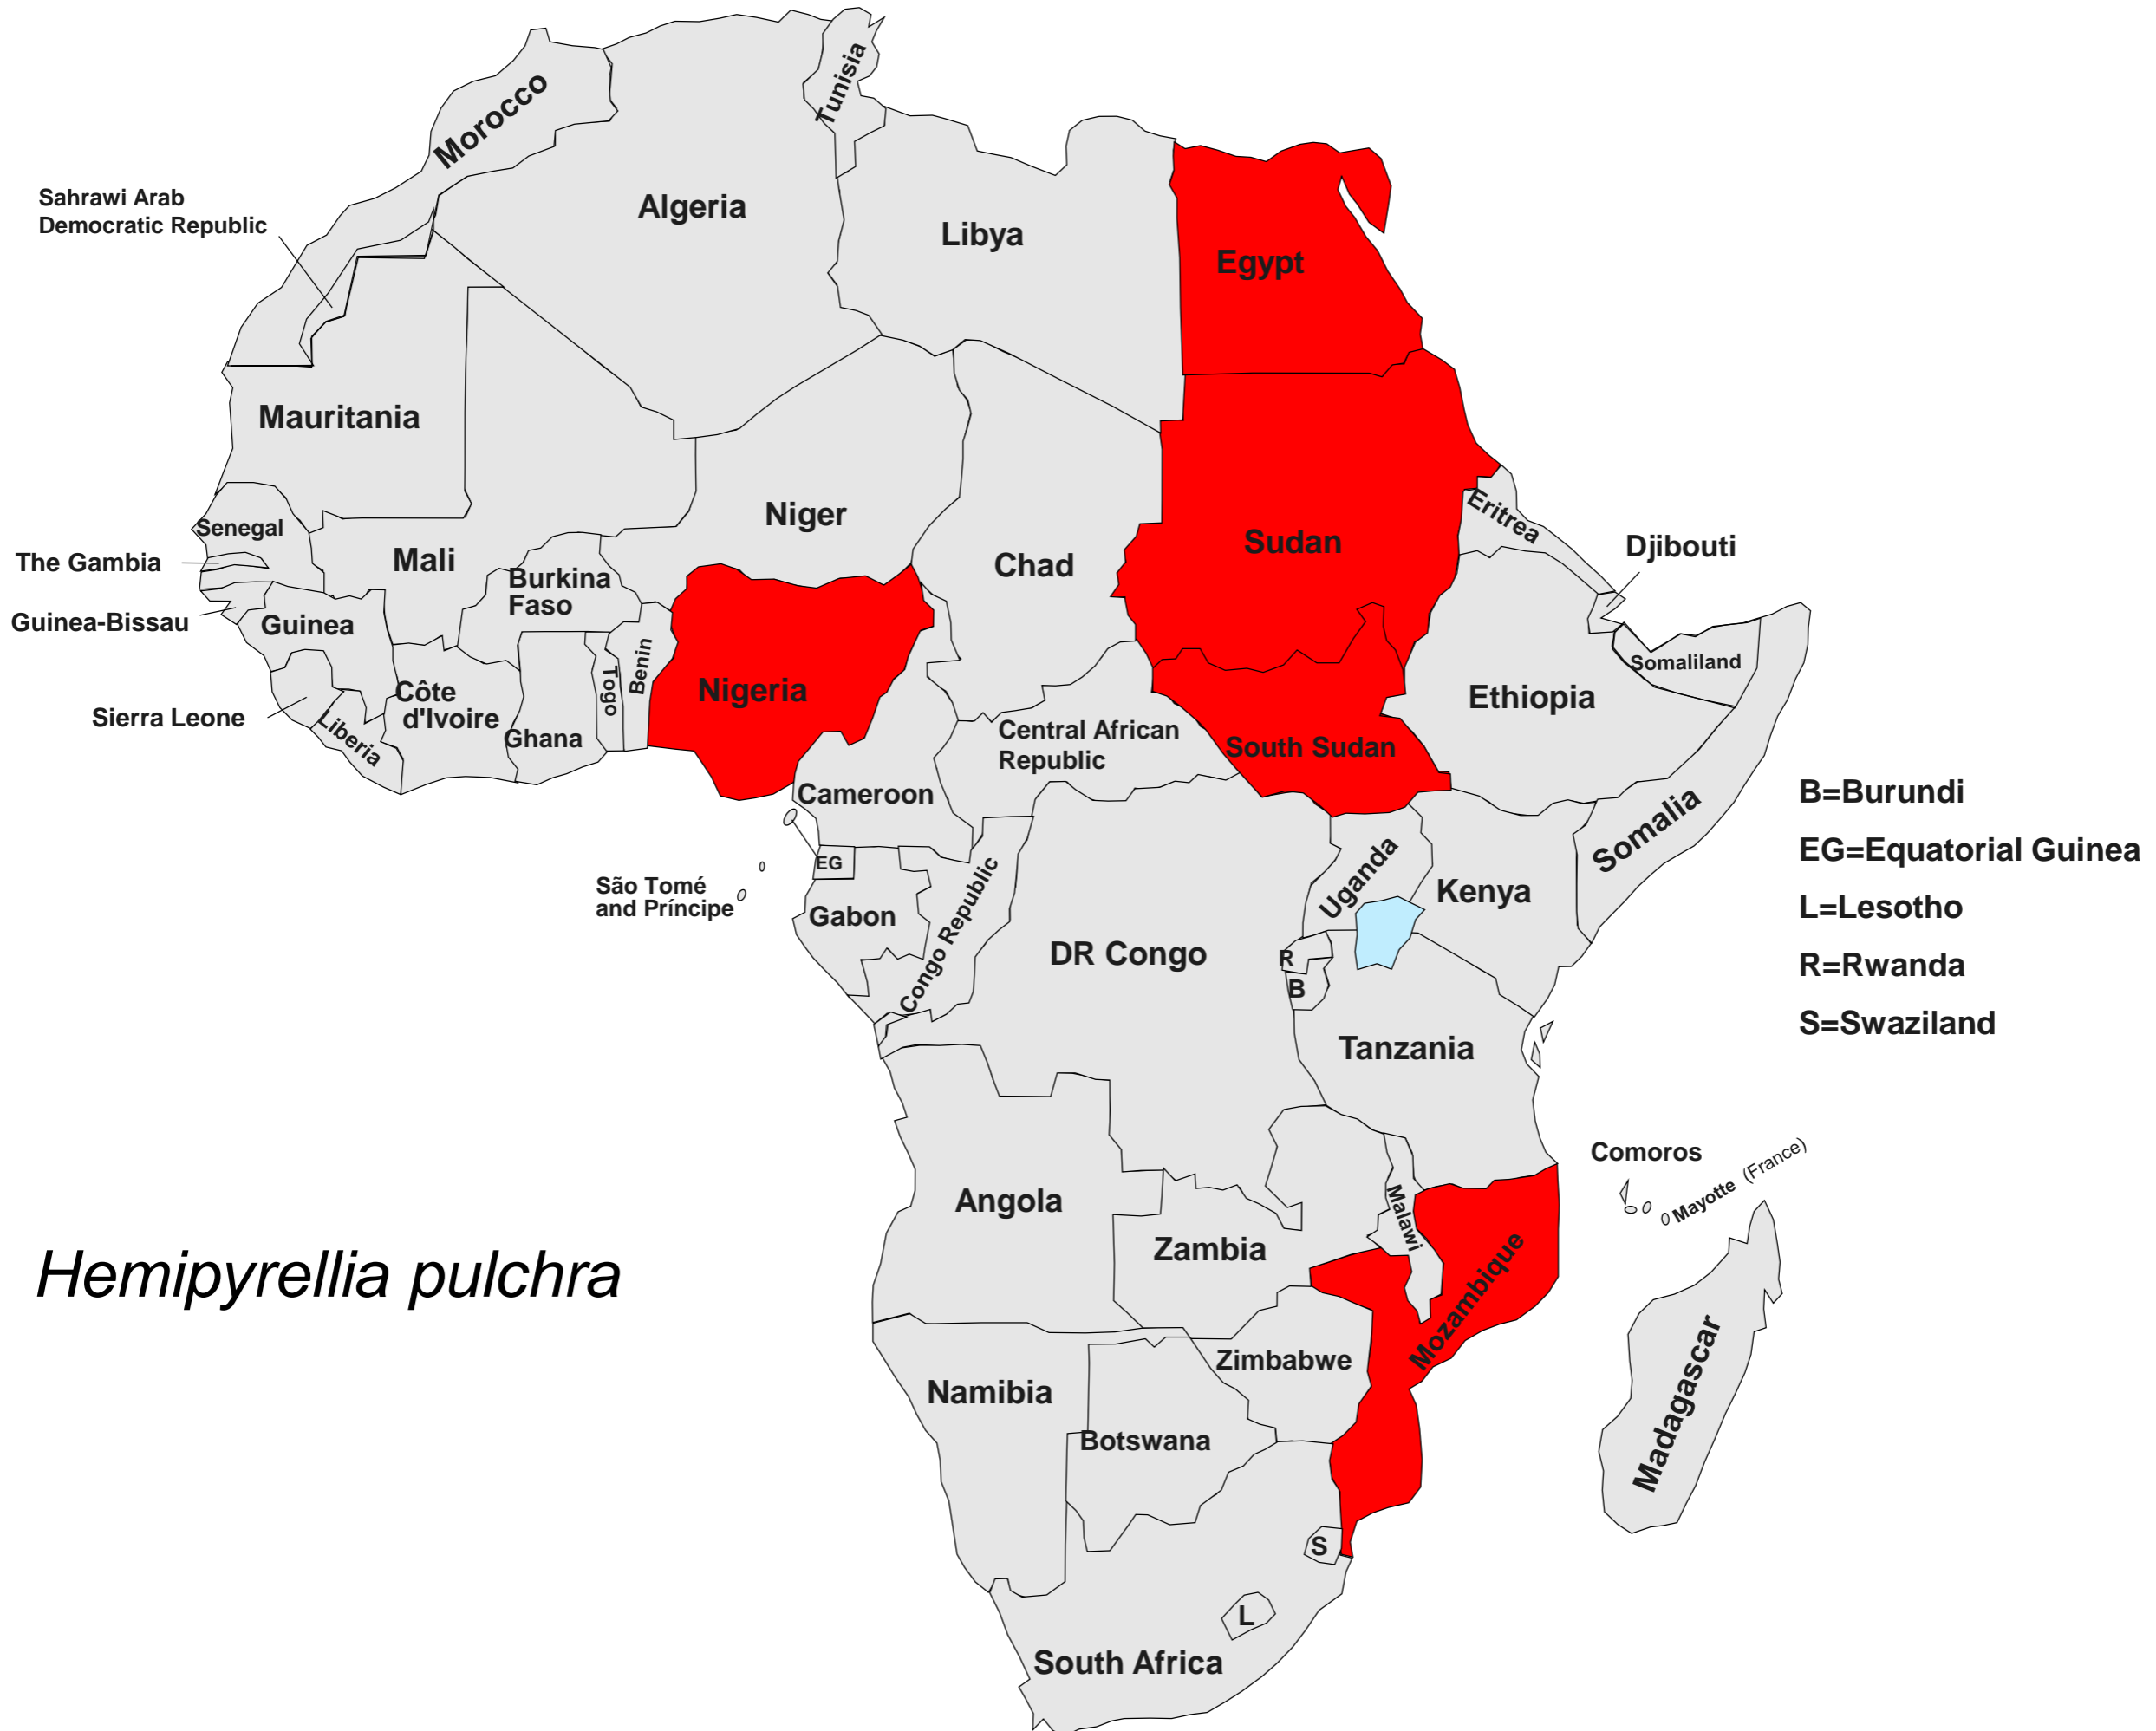

*Hemipyrellia pulchra*

- B=Burundi
- EG=Equatorial Guinea
- L=Lesotho
- R=Rwanda
- S=Swaziland

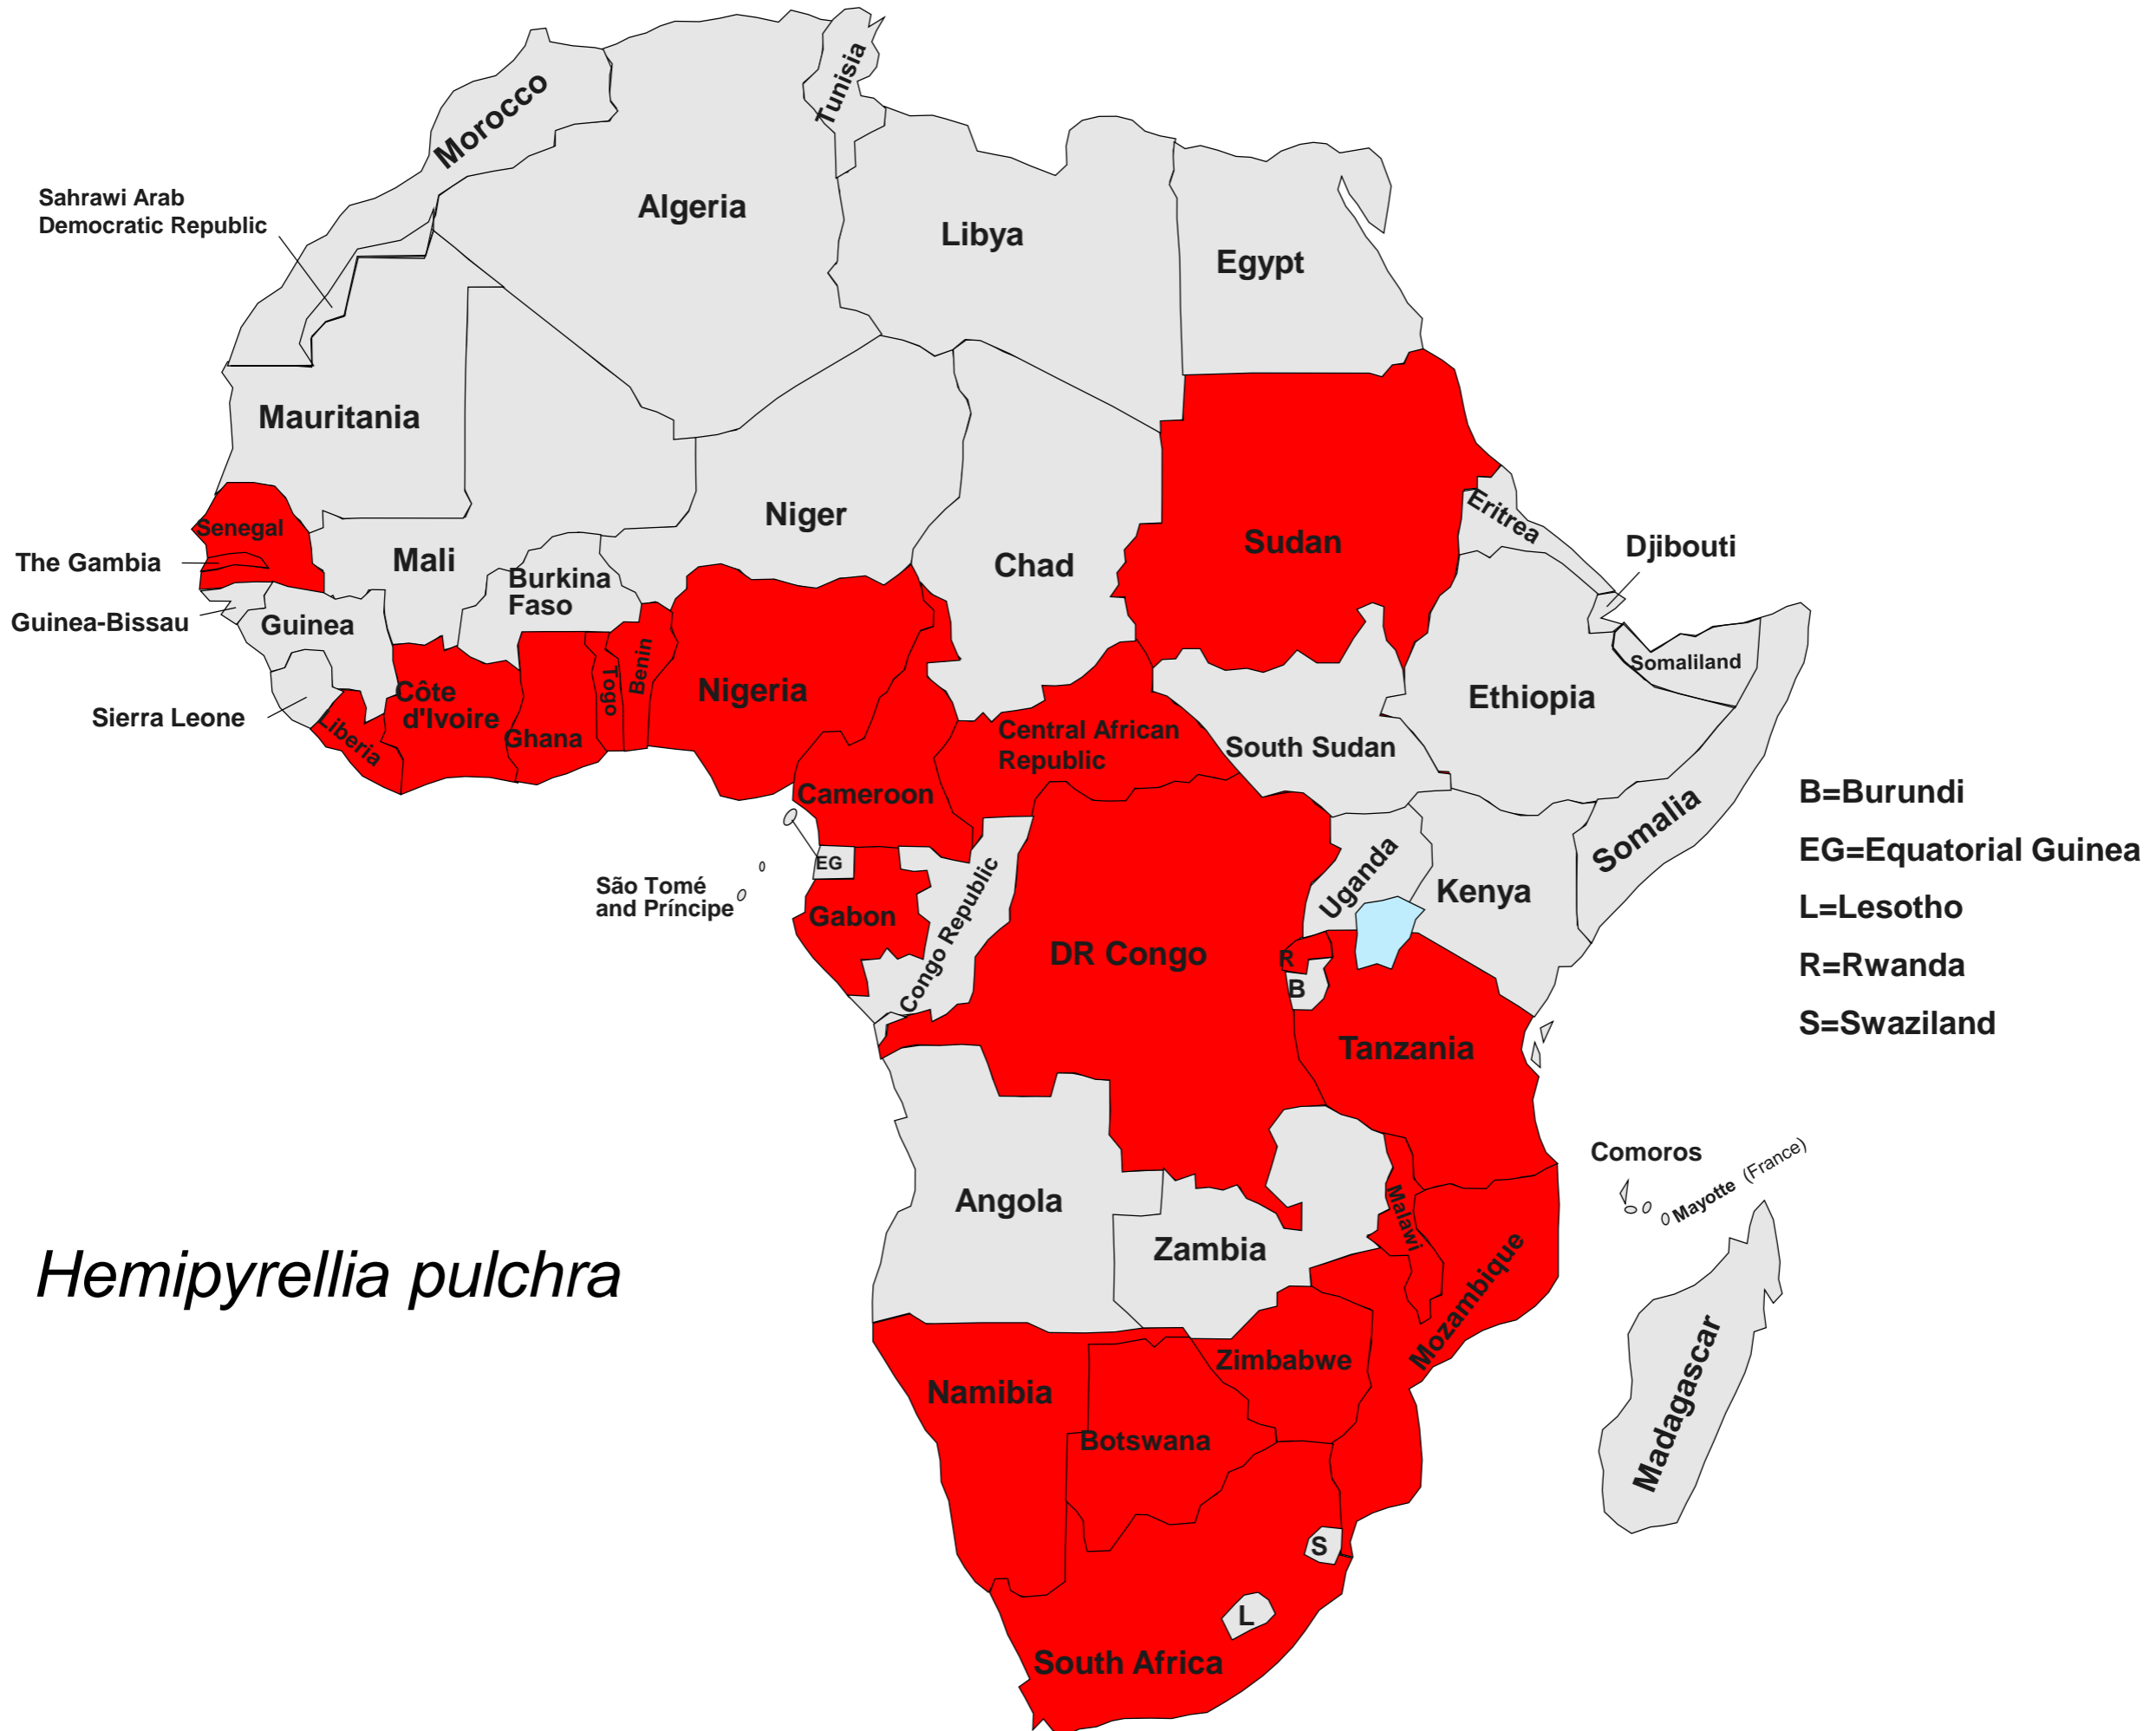

Supplement: MOESM1 [file 414_2017_1654_MOESM1_ESM.pdf]
